# Supplementary material
Source: publisher site journal article supplement (https://www.spandidos-publications.com/3092/downloadSupplementary)
Supplement: Supplementary file 1 [file downloadSupplementary]

## Sheet: Sheet1
Supplementary Table Ⅲ. Differentially expressed mRNAs with 1.5 fold change between mid-secretory phase and proliferative phase endometrium.
A, Upregulated mRNAs
Gene_Symbol	Description	FC	FC-SD	p-value
PAEP	progestagen associated endometrial protein	426.448	2.66246	0.00425784
CXCL14	C-X-C motif chemokine ligand 14	162.855	1.60752	0.00244346
GPX3	glutathione peroxidase 3	121.058	0.745319	1.45 x 10-5
TCN1	transcobalamin 1	71.4916	0.952368	6.03 x 10-4
C2CD4A	C2 calcium dependent domain containing 4A	59.5485	2.01187	0.00686884
DPP4	dipeptidyl peptidase 4	52.3765	1.39463	9.10 x 10-4
C4BPA	complement component 4 binding protein alpha	40.8157	0.841097	1.89 x 10-5
AOX1	aldehyde oxidase 1	38.7763	1.09304	0.00193765
CFD	complement factor D	31.4066	1.25653
DKK1	dickkopf WNT signaling pathway inhibitor 1	29.9378	1.44307	0.00210316
SLC15A1	solute carrier family 15 member 1	29.6491	1.67407	0.0082091
TSPAN8	tetraspanin 8	27.4455	1.57736	0.00175559
CP	ceruloplasmin	25.7405	1.16281	0.00313676
SLC30A2	solute carrier family 30 member 2	25.1472	2.12087	0.00588993
MAOA	monoamine oxidase A	24.6991	0.881264	6.54 x 10-5
MT1G	metallothionein 1G	24.4284	2.58689	0.0333029
SLC1A1	solute carrier family 1 member 1	23.0258	1.3218	0.00358331
GNLY	granulysin	22.9764	1.20086	5.52 x 10-4
SCARA5	scavenger receptor class A member 5	22.9564	0.961345	1.14 x 10-4
SLC3A1	solute carrier family 3 member 1	22.3881	2.14963	0.0098055
MT1M	metallothionein 1M	20.2102	2.18353	0.0241403
ANGPTL1	angiopoietin like 1	19.2124	1.4076	0.00222508
CYP3A5	cytochrome P450 family 3 subfamily A member 5	18.4552	0.674676	4.56 x 10-4
IRX3	iroquois homeobox 3	16.4827	1.09063	0.0038614
RIMKLB	ribosomal modification protein rimK like family member B	16.077	1.18242	0.00469774
IDO1	indoleamine 2,3-dioxygenase 1	15.7388	1.59522	0.00259439
LEFTY1	left-right determination factor 1	15.4835	1.85364	0.00932481
NNMT	nicotinamide N-methyltransferase	14.9909	0.417186	2.16 x 10-6
PTPRR	protein tyrosine phosphatase, receptor type R	14.778	0.466567	2.72 x 10-5
CATSPERB	cation channel sperm associated auxiliary subunit beta	14.7619	1.16246	0.00580371
GZMA	granzyme A	14.5171	1.19403	7.18 x 10-4
CD55	CD55 molecule (Cromer blood group)	14.14	1.02694	0.00128772
CRISP3	cysteine rich secretory protein 3	14.0524	1.32725	0.00123752
LAMB3	laminin subunit beta 3	13.5932	1.13979	0.00196904
C2CD4B	C2 calcium dependent domain containing 4B	13.5254	1.2557	0.00471696
GZMB	granzyme B	12.7274	0.989703	3.18 x 10-4
CTSW	cathepsin W	11.919	0.651186	2.47 x 10-4
SPP1	secreted phosphoprotein 1	11.3731	1.91646	0.0111889
PHYHIPL	phytanoyl-CoA 2-hydroxylase interacting protein like	11.019	1.27393	0.00953914
MEDAG	mesenteric estrogen dependent adipogenesis	10.8773	1.96092	0.0324986
SDCBP2	syndecan binding protein 2	10.7349	1.24453	0.0106994
HAP1	huntingtin associated protein 1	10.4451	1.06571	0.00752841
ALDH1A3	aldehyde dehydrogenase 1 family member A3	10.4047	2.34836	0.0398368
SERPING1	serpin family G member 1	10.3518	0.537299
APOD	apolipoprotein D	9.93681	1.02462
ARG2	arginase 2	9.77587	1.20349	0.00480602
G0S2	G0/G1 switch 2	9.73914	2.27609	0.0442317
S100A4	S100 calcium binding protein A4	9.72479	0.758428	3.78 x 10-4
TMEM45B	transmembrane protein 45B	9.6801	1.12561	0.00391591
HABP2	hyaluronan binding protein 2	9.65368	0.426074	1.94 x 10-5
EDNRB	endothelin receptor type B	9.62215	0.991306
SOD2	superoxide dismutase 2	9.47438	0.91276	4.13 x 10-4
TRPC4	transient receptor potential cation channel subfamily C member 4	9.47229	0.597202	6.37 x 10-5
GADD45A	growth arrest and DNA damage inducible alpha	9.21949	0.6406
PRODH	proline dehydrogenase 1	9.21536	1.12917	0.00355258
IL6ST	interleukin 6 signal transducer	9.17287	1.24768	0.00799682
AQP3	aquaporin 3 (Gill blood group)	8.91787	0.856465	0.00328185
FGF7	fibroblast growth factor 7	8.88348	0.95468	8.79 x 10-4
GRAMD1C	GRAM domain containing 1C	8.84409	0.842416	0.00205051
ABCC3	ATP binding cassette subfamily C member 3	8.81578	0.774279	4.91 x 10-4
HAL	histidine ammonia-lyase	8.39217	1.39411	0.0199318
FILIP1	filamin A interacting protein 1	8.11447	0.596161	5.62 x 10-4
MFSD4A	major facilitator superfamily domain containing 4A	8.03513	1.27419	0.0179493
TIMP3	TIMP metallopeptidase inhibitor 3	7.93528	1.29018	0.00375135
PRF1	perforin 1	7.90072	0.906355	8.22 x 10-4
MT1E	metallothionein 1E	7.85343	1.87587	0.0293142
KLRC1	killer cell lectin like receptor C1	7.83771	1.53917	0.00945085
GALNT13	polypeptide N-acetylgalactosaminyltransferase 13	7.82806	0.619413
SNX10	sorting nexin 10	7.63239	0.866078	0.00123493
LHFPL3	lipoma HMGIC fusion partner-like 3	7.56715	1.59073	0.0107113
RNASE4	ribonuclease A family member 4	7.52285	0.177157	5.30 x 10-8
TGM2	transglutaminase 2	7.49834	0.465916	1.94 x 10-4
C4B_2	complement component 4B (Chido blood group), copy 2	7.46382	0.352587	3.32 x 10-6
SLC7A2	solute carrier family 7 member 2	7.45401	0.659515	1.20 x 10-4
PRUNE2	prune homolog 2	7.30842	0.812765	4.95 x 10-4
MAP3K5	mitogen-activated protein kinase kinase kinase 5	7.0474	0.635061
THBS2	thrombospondin 2	7.01945	1.03158	0.0027087
ATP2C2	ATPase secretory pathway Ca2+ transporting 2	6.81353	1.10248	0.0144417
CLEC4E	C-type lectin domain family 4 member E	6.77254	0.374542	9.75 x 10-6
RPRM	reprimo, TP53 dependent G2 arrest mediator homolog	6.69033	1.20195	0.0148727
C10orf10	chromosome 10 open reading frame 10	6.63227	1.08651	0.00265199
IL2RB	interleukin 2 receptor subunit beta	6.56112	0.441902
NKG7	natural killer cell granule protein 7	6.46903	0.597131	1.14 x 10-4
FAM84B	family with sequence similarity 84 member B	6.42405	1.44867	0.0276989
RARRES3	retinoic acid receptor responder 3	6.42043	0.986475	0.00180286
LIF	LIF, interleukin 6 family cytokine	6.25564	1.5325	0.0283635
GABRA2	gamma-aminobutyric acid type A receptor alpha2 subunit	6.10943	0.416828	3.35 x 10-4
CLEC3B	C-type lectin domain family 3 member B	6.03473	0.822348	0.00198608
NPR1	natriuretic peptide receptor 1	6.00225	0.550245	9.07 x 10-5
CLDN4	claudin 4	5.96672	1.45769	0.0329674
MFAP5	microfibrillar associated protein 5	5.96097	0.804748	0.00137657
C3	complement C3	5.91136	1.07863	0.00771215
SLC18A2	solute carrier family 18 member A2	5.86188	1.64005	0.0229542
TMEM45A	transmembrane protein 45A	5.78267	0.799416	0.00132543
SYTL5	synaptotagmin like 5	5.72609	0.490066	1.25 x 10-4
LMOD1	leiomodin 1	5.72287	0.54928
FOXO1	forkhead box O1	5.7085	0.65632	0.00105183
GCNT3	glucosaminyl (N-acetyl) transferase 3, mucin type	5.69582	1.57874	0.0194231
AMIGO2	adhesion molecule with Ig like domain 2	5.60132	0.834706	0.0012058
AHNAK2	AHNAK nucleoprotein 2	5.59941	0.8432	0.00361523
GBP2	guanylate binding protein 2	5.56993	0.724749	0.00328225
PTGER2	prostaglandin E receptor 2	5.56776	0.737891	6.75 x 10-4
CEBPD	CCAAT/enhancer binding protein delta	5.56312	0.727544	5.47 x 10-4
IL15	interleukin 15	5.51096	0.84881	0.0045539
ANXA4	annexin A4	5.48816	0.708121	5.78 x 10-4
LINGO2	leucine rich repeat and Ig domain containing 2	5.48277	0.573592	1.46 x 10-4
SLPI	secretory leukocyte peptidase inhibitor	5.34334	1.26153	0.0292302
RETREG1	reticulophagy regulator 1	5.33572	0.460808	3.34 x 10-4
KLRC3	killer cell lectin like receptor C3	5.27741	1.23312	0.00809765
MYOCD	myocardin	5.25359	0.716352	0.0063291
ADAMTS5	ADAM metallopeptidase with thrombospondin type 1 motif 5	5.24059	0.795772	0.00258803
DNER	delta/notch like EGF repeat containing	5.22502	0.230079	3.12 x 10-5
NABP1	nucleic acid binding protein 1	5.18091	0.75045	7.77 x 10-4
KIF12	kinesin family member 12	5.15123	0.574238	6.85 x 10-4
ITGAD	integrin subunit alpha D	5.14552	1.07293	0.00478162
GRIA3	glutamate ionotropic receptor AMPA type subunit 3	5.12184	0.800232	0.00113108
PLA2G16	phospholipase A2 group XVI	5.12132	0.869101	0.00311455
TMEM154	transmembrane protein 154	5.10268	0.898083	0.00417753
TC2N	tandem C2 domains, nuclear	5.08723	0.995169	0.0138446
BCO1	beta-carotene oxygenase 1	5.07234	0.929184	0.0120316
SLCO4A1	solute carrier organic anion transporter family member 4A1	5.03738	1.2293	0.0274643
ADCY1	adenylate cyclase 1	5.03408	0.763779	0.004741
TMC5	transmembrane channel like 5	5.02536	0.82985	0.00155247
CDYL2	chromodomain Y like 2	5.00628	1.2069	0.0225322
FBXO32	F-box protein 32	4.9706	0.864422	0.00237137
GABARAPL1	GABA type A receptor associated protein like 1	4.96019	0.377358	3.22 x 10-5
GLB1L2	galactosidase beta 1 like 2	4.94334	0.801026	0.00329642
ADAMTS1	ADAM metallopeptidase with thrombospondin type 1 motif 1	4.92398	0.892233	0.00227237
KLRC2	killer cell lectin like receptor C2	4.901	1.4869	0.021916
LEFTY2	left-right determination factor 2	4.87631	0.576343	6.50 x 10-4
TMPRSS4	transmembrane protease, serine 4	4.87354	0.966664	0.00901123
EFNA1	ephrin A1	4.8407	0.84375	0.00287065
ATP6V1A	ATPase H+ transporting V1 subunit A	4.82065	0.638873	0.00480188
KRT7	keratin 7	4.82016	1.55639	0.030849
TRNP1	TMF1-regulated nuclear protein 1	4.77524	0.734146	8.51 x 10-4
MASP1	mannan binding lectin serine peptidase 1	4.7688	1.45935	0.0449858
CYP4B1	cytochrome P450 family 4 subfamily B member 1	4.76078	1.09121	0.00631402
CCL4	C-C motif chemokine ligand 4	4.70603	1.493	0.0346584
DYNLT3	dynein light chain Tctex-type 3	4.70541	0.908716	0.0120925
PPP1R3G	protein phosphatase 1 regulatory subunit 3G	4.70535	1.09503	0.00685863
DLGAP1	DLG associated protein 1	4.61445	0.691251	0.00366268
STAR	steroidogenic acute regulatory protein	4.59781	0.610105	0.00337524
ID4	inhibitor of DNA binding 4, HLH protein	4.58767	0.650913	0.00107328
STC1	stanniocalcin 1	4.5823	0.981176	0.00741816
DHRS3	dehydrogenase/reductase 3	4.55363	0.780434	0.00386219
ADAMTS15	ADAM metallopeptidase with thrombospondin type 1 motif 15	4.53444	1.27659	0.0141998
ANG	angiogenin	4.51134	0.557262	5.44 x 10-4
MT2A	metallothionein 2A	4.45932	1.30062	0.0341393
LRIG3	leucine rich repeats and immunoglobulin like domains 3	4.44651	0.437752	1.50 x 10-4
NDRG1	N-myc downstream regulated 1	4.44516	0.721174	0.00415121
MET	MET proto-oncogene, receptor tyrosine kinase	4.44516	0.775607	0.00170087
RHPN2	rhophilin Rho GTPase binding protein 2	4.42323	1.26564	0.0364884
CRYAB	crystallin alpha B	4.40991	0.420909	1.48 x 10-4
SORCS1	sortilin related VPS10 domain containing receptor 1	4.38477	0.652013	0.00619247
DEPTOR	DEP domain containing MTOR interacting protein	4.38164	0.558764	3.53 x 10-4
FGL2	fibrinogen like 2	4.33096	1.18816	0.018845
SLA	Src like adaptor	4.32353	1.13006	0.0200499
FBLN2	fibulin 2	4.31701	0.788134	0.00615318
LMCD1	LIM and cysteine rich domains 1	4.27876	0.468853	1.62 x 10-4
ADRA2A	adrenoceptor alpha 2A	4.25365	0.805655	0.00550073
B4GALNT3	beta-1,4-N-acetyl-galactosaminyltransferase 3	4.24405	1.30342	0.0205888
IRS2	insulin receptor substrate 2	4.22861	0.8067	0.00320971
C2	complement C2	4.22194	0.366376	1.15 x 10-4
C1R	complement C1r	4.21197	0.47013	2.26 x 10-4
IDO2	indoleamine 2,3-dioxygenase 2	4.1896	0.470312	1.45 x 10-4
PAPLN	papilin, proteoglycan like sulfated glycoprotein	4.18436	0.946975	0.00505277
SYNE2	spectrin repeat containing nuclear envelope protein 2	4.17481	0.440547	2.62 x 10-4
CHRD	chordin	4.16047	0.776753	0.00275083
PRLR	prolactin receptor	4.15029	0.951807	0.00692796
ABCC8	ATP binding cassette subfamily C member 8	4.13577	0.988585	0.00831819
NUPR1	nuclear protein 1, transcriptional regulator	4.09501	0.765493	0.00702894
BCL6	B-cell CLL/lymphoma 6	4.09146	0.59956	0.00202286
C12orf75	chromosome 12 open reading frame 75	4.08096	1.12104	0.0335099
ENPEP	glutamyl aminopeptidase	4.06477	0.658499	9.79 x 10-4
VNN1	vanin 1	4.03263	1.21692	0.0180181
KLRC4	killer cell lectin like receptor C4	4.03037	1.34159	0.0249246
COLEC11	collectin subfamily member 11	3.98841	0.797426	0.00289064
MGST1	microsomal glutathione S-transferase 1	3.98034	0.883721	0.00421188
MUC16	mucin 16, cell surface associated	3.97693	0.960051	0.00790403
NCAM1	neural cell adhesion molecule 1	3.9567	0.668322	0.00162281
S100A6	S100 calcium binding protein A6	3.94772	0.490225	2.49 x 10-4
STARD5	StAR related lipid transfer domain containing 5	3.93342	0.479526	0.00202395
PCDH17	protocadherin 17	3.91154	1.06823	0.0255068
DAPK1	death associated protein kinase 1	3.88033	0.450276	4.64 x 10-4
PPARGC1A	PPARG coactivator 1 alpha	3.86516	1.02708	0.0296314
FAM3C	family with sequence similarity 3 member C	3.8176	0.702952	0.0108249
SLC6A12	solute carrier family 6 member 12	3.81424	0.36032	0.00151733
CITED2	Cbp/p300 interacting transactivator with Glu/Asp rich carboxy-terminal domain 2	3.80705	0.730842	0.00255599
STAP1	signal transducing adaptor family member 1	3.78432	0.804307	0.00558564
CD247	CD247 molecule	3.78393	1.16692	0.01661
NFIL3	nuclear factor, interleukin 3 regulated	3.75242	0.888732	0.00880963
ZBTB16	zinc finger and BTB domain containing 16	3.73588	1.38535	0.0477173
CYS1	cystin 1	3.73336	0.88458	0.0131048
FXYD3	FXYD domain containing ion transport regulator 3	3.72929	1.04647	0.0121495
FGR	FGR proto-oncogene, Src family tyrosine kinase	3.72644	0.915609	0.00839578
MTF1	metal regulatory transcription factor 1	3.72608	0.899796	0.0228853
TTC39A	tetratricopeptide repeat domain 39A	3.70343	0.82029	0.0107477
EFEMP1	EGF containing fibulin like extracellular matrix protein 1	3.70198	0.698191	0.00248986
VCAM1	vascular cell adhesion molecule 1	3.66293	0.8889	0.00568953
EMILIN2	elastin microfibril interfacer 2	3.64959	0.541326	4.99 x 10-4
SPOCK1	SPARC/osteonectin, cwcv and kazal like domains proteoglycan 1	3.64797	0.596629	0.00528836
CDKN2B	cyclin dependent kinase inhibitor 2B	3.62712	0.605878	0.00142515
TARP	TCR gamma alternate reading frame protein	3.6166	1.25204	0.0255166
GALNT15	polypeptide N-acetylgalactosaminyltransferase 15	3.60663	0.599459	0.00695987
ATP8B4	ATPase phospholipid transporting 8B4 (putative)	3.60154	0.925821	0.00740146
PROS1	protein S (alpha)	3.58978	0.365404	6.80 x 10-4
C1S	complement C1s	3.58405	0.460429	7.89 x 10-4
HTR2A	5-hydroxytryptamine receptor 2A	3.56436	0.436041	0.00255334
HAS2	hyaluronan synthase 2	3.56344	0.286036	4.72 x 10-4
SRGN	serglycin	3.56321	1.16419	0.033049
CSF2RA	colony stimulating factor 2 receptor alpha subunit	3.55527	0.888958	0.00624496
DCN	decorin	3.55249	0.866434	0.00884759
TYMP	thymidine phosphorylase	3.53939	0.840755	0.0124081
HOPX	HOP homeobox	3.53239	0.904364	0.0070954
EIF4E3	eukaryotic translation initiation factor 4E family member 3	3.52227	0.816257	0.0179459
ACPP	acid phosphatase, prostate	3.51535	1.38213	0.0434007
ELOVL7	ELOVL fatty acid elongase 7	3.51071	0.670607	0.00789795
ARID5B	AT-rich interaction domain 5B	3.51014	0.560264
SYT13	synaptotagmin 13	3.49549	0.944341	0.0283295
ITGAX	integrin subunit alpha X	3.49248	0.741571	0.00387876
SRD5A3	steroid 5 alpha-reductase 3	3.48194	0.731958	0.00897484
TGFB2	transforming growth factor beta 2	3.48105	0.965722	0.0277514
TUBA4A	tubulin alpha 4a	3.46777	0.89828	0.00923438
SPTLC3	serine palmitoyltransferase long chain base subunit 3	3.44927	1.30012	0.0485689
RASEF	RAS and EF-hand domain containing	3.44579	0.834189	0.0109546
SESTD1	SEC14 and spectrin domain containing 1	3.43745	0.773625	0.0148761
MRPS2	mitochondrial ribosomal protein S2	3.4326	0.874901	0.0249413
KLF6	Kruppel like factor 6	3.42942	0.808086	0.00608219
TFPI	tissue factor pathway inhibitor	3.41261	0.78479	0.0102631
ABCA6	ATP binding cassette subfamily A member 6	3.41223	0.80794	0.00578284
CD68	CD68 molecule	3.39896	0.95901	0.0227572
ARHGEF38	Rho guanine nucleotide exchange factor 38	3.39659	0.499375	0.00146651
ANXA2	annexin A2	3.39287	0.748809	0.0152722
HSPB6	heat shock protein family B (small) member 6	3.38142	0.238712	2.82 x 10-4
SLC8A1	solute carrier family 8 member A1	3.37775	0.816101	0.0108271
GPRC5C	G protein-coupled receptor class C group 5 member C	3.37543	0.714415	0.00546411
ENPP1	ectonucleotide pyrophosphatase/phosphodiesterase 1	3.37481	1.05992	0.0206921
CD300A	CD300a molecule	3.36752	0.846435	0.0075091
FKBP5	FK506 binding protein 5	3.35658	1.09339	0.0261078
APBB1IP	amyloid beta precursor protein binding family B member 1 interacting protein	3.35537	0.632359	0.00213912
PAX8	paired box 8	3.34746	1.08233	0.0350492
ABI3BP	ABI family member 3 binding protein	3.3467	0.709209	0.0026718
CORO1A	coronin 1A	3.32242	0.874062	0.00913982
HNMT	histamine N-methyltransferase	3.31222	0.379692	1.54 x 10-4
DNAJC6	DnaJ heat shock protein family (Hsp40) member C6	3.30313	0.894693	0.0276159
RORC	RAR related orphan receptor C	3.30186	0.771788	0.0159501
SLC16A3	solute carrier family 16 member 3	3.2961	0.834063	0.00849596
TMEM37	transmembrane protein 37	3.29264	0.551403	0.0039478
DDX52	DExD-box helicase 52	3.27854	1.04674	0.0437495
ARHGAP24	Rho GTPase activating protein 24	3.27755	0.84072	0.0124745
MGAT4A	mannosyl (alpha-1,3-)-glycoprotein beta-1,4-N-acetylglucosaminyltransferase, isozyme A	3.27671	0.594398	0.0086185
DSC2	desmocollin 2	3.27436	0.662996	0.00221208
ANKRD33B	ankyrin repeat domain 33B	3.27284	0.733961	0.00374206
ARSB	arylsulfatase B	3.27227	0.690195	0.00984925
SLC15A4	solute carrier family 15 member 4	3.26724	0.740868	0.0090673
RAC2	ras-related C3 botulinum toxin substrate 2 (rho family, small GTP binding protein Rac2)	3.2386	0.439366	0.00131976
TMEM140	transmembrane protein 140	3.23405	0.623595	0.00167989
ARSE	arylsulfatase E (chondrodysplasia punctata 1)	3.23352	0.920127	0.0139841
RAMP3	receptor activity modifying protein 3	3.22774	0.979405	0.0219259
FCER1G	Fc fragment of IgE receptor Ig	3.22292	1.1896	0.0357993
PPFIBP2	PPFIA binding protein 2	3.19938	0.849066	0.0238767
FOSL2	FOS like 2, AP-1 transcription factor subunit	3.19869	0.605054	0.0040051
TYROBP	TYRO protein tyrosine kinase binding protein	3.19115	1.23018	0.0358409
GPD1L	glycerol-3-phosphate dehydrogenase 1-like	3.18446	0.740235	0.0127935
SYTL3	synaptotagmin like 3	3.17792	0.334607	6.99 x 10-5
PNP	purine nucleoside phosphorylase	3.17771	1.12482	0.0448227
SFMBT2	Scm-like with four mbt domains 2	3.17196	0.5288	8.38 x 10-4
S100A14	S100 calcium binding protein A14	3.16906	0.826195	0.00714605
ITM2A	integral membrane protein 2A	3.16463	1.01809	0.0177863
MAMDC2	MAM domain containing 2	3.15139	1.12499	0.0296303
PCDH20	protocadherin 20	3.14983	1.13165	0.0294655
ARHGAP9	Rho GTPase activating protein 9	3.14112	0.488436	9.81 x 10-4
ANTXR2	anthrax toxin receptor 2	3.13587	0.556813	0.00341327
HAND2	heart and neural crest derivatives expressed 2	3.1254	0.423438	3.33 x 10-4
ABCC9	ATP binding cassette subfamily C member 9	3.10673	0.343969	2.55 x 10-4
MAOB	monoamine oxidase B	3.10492	0.720683	0.00618863
NTRK2	neurotrophic receptor tyrosine kinase 2	3.09529	0.96812	0.0412538
HCST	hematopoietic cell signal transducer	3.08769	0.709654	0.00455606
GPR160	G protein-coupled receptor 160	3.08355	0.765945	0.00659265
EOMES	eomesodermin	3.08074	0.963476	0.0153925
SCIN	scinderin	3.08009	0.666665	0.00280243
FAM149A	family with sequence similarity 149 member A	3.07918	0.677906	0.0106962
OSMR	oncostatin M receptor	3.07709	0.489436	5.77 x 10-4
MMRN1	multimerin 1	3.06658	0.785972	0.00722539
MUM1L1	MUM1 like 1	3.06494	0.780112	0.0108725
CACNB2	calcium voltage-gated channel auxiliary subunit beta 2	3.05813	0.606744	0.0019837
EPAS1	endothelial PAS domain protein 1	3.05773	0.293421	3.40 x 10-5
PERP	PERP, TP53 apoptosis effector	3.05327	0.712126	0.0130745
PLXNC1	plexin C1	3.0326	1.02429	0.0295915
GFOD1	glucose-fructose oxidoreductase domain containing 1	3.02619	0.2817	3.20 x 10-5
C11orf52	chromosome 11 open reading frame 52	3.00753	0.709714	0.00966622
GDF15	growth differentiation factor 15	2.9908	1.07766	0.0271046
PSTPIP1	proline-serine-threonine phosphatase interacting protein 1	2.98768	0.620747	0.00241113
SLC44A1	solute carrier family 44 member 1	2.98144	0.643546	0.0139
GABRP	gamma-aminobutyric acid type A receptor pi subunit	2.97048	0.920664	0.0143661
ITGA3	integrin subunit alpha 3	2.96943	0.86392	0.0282722
KLRD1	killer cell lectin like receptor D1	2.96228	0.971601	0.0180934
DOCK8	dedicator of cytokinesis 8	2.95739	0.615811	0.011253
PALMD	palmdelphin	2.9505	0.322494	1.07 x 10-4
MVP	major vault protein	2.94863	0.570428	0.0025501
IER3	immediate early response 3	2.94825	1.01378	0.0234532
LCP1	lymphocyte cytosolic protein 1	2.94548	0.558984	0.00160666
IL2RG	interleukin 2 receptor subunit gamma	2.94415	0.674775	0.00442564
RRAS	related RAS viral (r-ras) oncogene homolog	2.94253	0.512495	0.00375211
ERP27	endoplasmic reticulum protein 27	2.93371	0.762811	0.00659882
GRIA1	glutamate ionotropic receptor AMPA type subunit 1	2.92589	0.403489	2.87 x 10-4
GABRE	gamma-aminobutyric acid type A receptor epsilon subunit	2.91525	0.34837	0.00242445
STYK1	serine/threonine/tyrosine kinase 1	2.91491	0.496593	0.00103708
GUCY1B3	guanylate cyclase 1 soluble subunit beta	2.91468	0.603562	0.00482197
LURAP1L	leucine rich adaptor protein 1 like	2.8983	0.419039	0.00275279
RAPGEF5	Rap guanine nucleotide exchange factor 5	2.89751	0.485693	0.00524291
BCL2L10	BCL2 like 10	2.89591	0.709914	0.0214313
SORBS1	sorbin and SH3 domain containing 1	2.89373	0.751653	0.0139858
AGR2	anterior gradient 2, protein disulphide isomerase family member	2.89317	0.962622	0.0198525
CLDN10	claudin 10	2.89056	0.470096	8.43 x 10-4
SLC16A7	solute carrier family 16 member 7	2.87987	0.663737	0.00824775
C1orf21	chromosome 1 open reading frame 21	2.87929	0.906503	0.027591
SNX29	sorting nexin 29	2.8778	0.508307	0.0021686
MLPH	melanophilin	2.87241	0.927779	0.01702
SPTSSB	serine palmitoyltransferase small subunit B	2.84584	0.972617	0.0495843
UBE2Q2L	ubiquitin conjugating enzyme E2 Q2 like	2.84296	0.555101	0.00874452
FMO5	flavin containing monooxygenase 5	2.83116	0.660732	0.010879
ZAP70	zeta chain of T-cell receptor associated protein kinase 70	2.83027	0.931433	0.0184819
SLC40A1	solute carrier family 40 member 1	2.8291	0.843738	0.0173638
CD58	CD58 molecule	2.82705	0.411024	3.51 x 10-4
SCCPDH	saccharopine dehydrogenase (putative)	2.8252	0.537826	0.00747337
IMPA2	inositol monophosphatase 2	2.82485	0.760018	0.0220488
DBNDD2	dysbindin domain containing 2	2.82437	0.444633	5.21 x 10-4
RASSF6	Ras association domain family member 6	2.81724	0.726876	0.0244723
CYP26A1	cytochrome P450 family 26 subfamily A member 1	2.79882	0.785891	0.0103446
TMIGD2	transmembrane and immunoglobulin domain containing 2	2.79409	1.00887	0.0390868
FAM20A	FAM20A, golgi associated secretory pathway pseudokinase	2.78753	0.867944	0.0171736
DOCK10	dedicator of cytokinesis 10	2.78664	0.735248	0.00697192
IVNS1ABP	influenza virus NS1A binding protein	2.78594	0.896473	0.0166269
PIK3R1	phosphoinositide-3-kinase regulatory subunit 1	2.78324	0.517293	0.00140033
ACADSB	acyl-CoA dehydrogenase, short/branched chain	2.7805	0.798041	0.0319368
MAF	MAF bZIP transcription factor	2.77986	0.786122	0.0163061
HTATIP2	HIV-1 Tat interactive protein 2	2.77126	0.614915	0.00391876
NCOA7	nuclear receptor coactivator 7	2.77124	0.797561	0.0105607
F2RL1	F2R like trypsin receptor 1	2.76703	1.11007	0.0409179
IGF2	insulin like growth factor 2	2.76187	0.710573	0.00918494
AVIL	advillin	2.76184	0.554534	0.0109616
ZNF888	zinc finger protein 888	2.75561	0.948663	0.0262395
SLC38A1	solute carrier family 38 member 1	2.7555	0.636892	0.00444102
RGS16	regulator of G protein signaling 16	2.75307	0.548847	0.00191715
TLR4	toll like receptor 4	2.74901	0.437019	9.49 x 10-4
HPSE	heparanase	2.74881	0.541049	0.00310545
LGALS3	galectin 3	2.74744	0.524193	0.00206896
APLP2	amyloid beta precursor like protein 2	2.74591	0.377014	3.85 x 10-4
VAV3	vav guanine nucleotide exchange factor 3	2.73561	0.553974	0.00987537
SLC44A4	solute carrier family 44 member 4	2.73262	0.928353	0.042437
PPP2R5A	protein phosphatase 2 regulatory subunit B'alpha	2.732	0.388873	0.00337053
TSPAN12	tetraspanin 12	2.72737	0.430509	0.00372127
ABCA8	ATP binding cassette subfamily A member 8	2.72578	0.964166	0.0240065
SOD3	superoxide dismutase 3	2.72437	0.497559	0.00114636
KCNS2	potassium voltage-gated channel modifier subfamily S member 2	2.72039	0.947582	0.0352109
TLR3	toll like receptor 3	2.72037	0.767867	0.0101838
COTL1	coactosin like F-actin binding protein 1	2.71521	0.684366	0.0213554
BDKRB2	bradykinin receptor B2	2.71506	1.09581	0.0452001
SH2D1B	SH2 domain containing 1B	2.71339	0.480698	0.00181331
P2RY1	purinergic receptor P2Y1	2.71337	0.534633	0.00180416
TSPAN15	tetraspanin 15	2.70852	0.905194	0.0205782
LBP	lipopolysaccharide binding protein	2.70535	0.872717	0.0458441
MITF	melanogenesis associated transcription factor	2.70225	0.429276	0.0051095
PPP1R14C	protein phosphatase 1 regulatory inhibitor subunit 14C	2.70105	0.728206	0.0084215
LDHA	lactate dehydrogenase A	2.6956	0.901364	0.0205038
STAT4	signal transducer and activator of transcription 4	2.69493	1.10109	0.0408366
HKDC1	hexokinase domain containing 1	2.6931	0.493076	0.00618419
SMPDL3A	sphingomyelin phosphodiesterase acid like 3A	2.69204	0.653516	0.00923392
ACKR1	atypical chemokine receptor 1 (Duffy blood group)	2.6906	0.363705	2.35 x 10-4
HAVCR2	hepatitis A virus cellular receptor 2	2.68795	0.988735	0.0292115
DMRTA1	DMRT like family A1	2.68473	0.980301	0.0271118
RXFP1	relaxin/insulin like family peptide receptor 1	2.67838	1.03943	0.0363479
ADIRF	adipogenesis regulatory factor	2.67691	0.314539	1.40 x 10-4
CRISPLD2	cysteine rich secretory protein LCCL domain containing 2	2.67307	0.938708	0.0335936
HNF1B	HNF1 homeobox B	2.66408	0.871965	0.043877
MUC20	mucin 20, cell surface associated	2.6628	0.407957	0.00414907
PC	pyruvate carboxylase	2.65315	0.326421	1.85 x 10-4
TBC1D2	TBC1 domain family member 2	2.64806	0.574693	0.0108573
HSD3B7	hydroxy-delta-5-steroid dehydrogenase, 3 beta- and steroid delta-isomerase 7	2.64662	0.347398	2.43 x 10-4
TXNIP	thioredoxin interacting protein	2.64208	0.62196	0.00556289
SEPT5	septin 5	2.63249	0.764273	0.0106702
INPP4B	inositol polyphosphate-4-phosphatase type II B	2.63122	0.557887	0.00611563
SHISA3	shisa family member 3	2.63113	0.850726	0.04196
ISG20	interferon stimulated exonuclease gene 20	2.63101	0.724189	0.0130414
GRB7	growth factor receptor bound protein 7	2.63028	0.745522	0.0310824
PRDM8	PR/SET domain 8	2.62249	0.303361	1.66 x 10-4
LYPLAL1	lysophospholipase like 1	2.61787	0.748879	0.0134781
FAM89A	family with sequence similarity 89 member A	2.61539	0.588541	0.0114785
FASLG	Fas ligand	2.61351	0.729902	0.0102904
TNFAIP2	TNF alpha induced protein 2	2.61277	0.457213	0.00220237
PTN	pleiotrophin	2.61105	0.976326	0.0399481
CALCRL	calcitonin receptor like receptor	2.59992	0.840217	0.0351169
TBXAS1	thromboxane A synthase 1	2.59556	0.817219	0.0232337
THSD7A	thrombospondin type 1 domain containing 7A	2.59459	0.7453	0.0102906
HDAC7	histone deacetylase 7	2.59456	0.636389	0.0146999
PAQR3	progestin and adipoQ receptor family member 3	2.5917	0.594054	0.00874799
ST6GALNAC5	ST6 N-acetylgalactosaminide alpha-2,6-sialyltransferase 5	2.58822	0.537871	0.00917569
CDH1	cadherin 1	2.58696	1.11719	0.0498036
PTGER3	prostaglandin E receptor 3	2.57844	0.606537	0.00548802
CALHM2	calcium homeostasis modulator 2	2.57514	0.522051	0.00332305
FHDC1	FH2 domain containing 1	2.57452	0.598246	0.015707
CAPZA2	capping actin protein of muscle Z-line alpha subunit 2	2.57089	0.572786	0.00786449
FAM69A	family with sequence similarity 69 member A	2.56918	0.649633	0.00575103
NLGN4X	neuroligin 4, X-linked	2.56527	0.367218	6.83 x 10-4
SLA2	Src like adaptor 2	2.55582	0.577456	0.00687242
TMBIM1	transmembrane BAX inhibitor motif containing 1	2.54659	0.313876	3.08 x 10-4
SASH3	SAM and SH3 domain containing 3	2.54027	0.463458	0.00114735
SPSB2	splA/ryanodine receptor domain and SOCS box containing 2	2.53418	0.725468	0.0106614
CLU	clusterin	2.52912	1.05532	0.044985
CYBRD1	cytochrome b reductase 1	2.52822	0.830874	0.0262264
SLIT3	slit guidance ligand 3	2.52562	0.664044	0.0137548
AKAP13	A-kinase anchoring protein 13	2.51005	0.88335	0.0425713
ARHGAP29	Rho GTPase activating protein 29	2.5051	0.460154	0.00286821
LMO7	LIM domain 7	2.50073	0.688133	0.00854525
SERPINE1	serpin family E member 1	2.50063	0.606511	0.00626958
AIMP1	aminoacyl tRNA synthetase complex interacting multifunctional protein 1	2.49958	0.815315	0.0411355
SYNPO2	synaptopodin 2	2.49745	0.550246	0.00311739
PLAC9	placenta specific 9	2.49258	0.467332	0.00184253
NID1	nidogen 1	2.48904	0.92194	0.031129
C1orf116	chromosome 1 open reading frame 116	2.48847	0.663638	0.0279142
CLCF1	cardiotrophin like cytokine factor 1	2.48079	0.39843	6.10 x 10-4
FAM49A	family with sequence similarity 49 member A	2.47732	0.667437	0.00818028
PARD6B	par-6 family cell polarity regulator beta	2.47037	0.52505	0.0117029
CD96	CD96 molecule	2.46409	1.02821	0.0450834
ARHGEF28	Rho guanine nucleotide exchange factor 28	2.46287	0.380128	8.15 x 10-4
B3GNT3	UDP-GlcNAc:betaGal beta-1,3-N-acetylglucosaminyltransferase 3	2.45584	0.444376	0.0080903
LEPR	leptin receptor	2.45157	0.409693	0.00595546
STON1	stonin 1	2.44017	0.569976	0.0128315
PRR16	proline rich 16	2.43704	0.300382
IL1R1	interleukin 1 receptor type 1	2.4357	0.987311	0.0428574
C19orf33	chromosome 19 open reading frame 33	2.43369	0.875803	0.0262926
EMP1	epithelial membrane protein 1	2.43361	0.48768	0.00580938
LEPROT	leptin receptor overlapping transcript	2.4296	0.628833	0.0100035
DOK2	docking protein 2	2.42776	0.721327	0.0121021
KIAA0513	KIAA0513	2.42208	0.52584	0.00378002
FOXP1	forkhead box P1	2.41885	0.267134	7.71 x 10-5
TGFBR2	transforming growth factor beta receptor 2	2.41277	0.480432	0.00255597
HSPB2	heat shock protein family B (small) member 2	2.4101	0.623474	0.00919804
PLAGL1	PLAG1 like zinc finger 1	2.40887	0.395057	0.00210196
DES	desmin	2.40876	0.601588	0.0170054
JUP	junction plakoglobin	2.40498	0.840051	0.0446418
ALDH3B1	aldehyde dehydrogenase 3 family member B1	2.39895	0.450669	0.0021961
TBC1D8	TBC1 domain family member 8	2.39485	0.184078	1.43 x 10-5
IL1R2	interleukin 1 receptor type 2	2.39421	0.763187	0.0164022
MUC13	mucin 13, cell surface associated	2.39343	0.906644	0.0344568
B3GNT7	UDP-GlcNAc:betaGal beta-1,3-N-acetylglucosaminyltransferase 7	2.38641	0.289412	1.32 x 10-4
FAM110C	family with sequence similarity 110 member C	2.3824	0.730252	0.0175476
MTMR7	myotubularin related protein 7	2.3802	0.436619	0.00421795
TOB1	transducer of ERBB2, 1	2.37824	0.603445	0.0109447
ACSL4	acyl-CoA synthetase long-chain family member 4	2.37456	0.846208	0.0288987
TNS2	tensin 2	2.37364	0.550601	0.00916315
GRAMD2B	GRAM domain containing 2B	2.37126	0.156184	4.39 x 10-6
DOCK2	dedicator of cytokinesis 2	2.36937	0.855334	0.02995
PROCR	protein C receptor	2.36704	0.702805	0.0242395
TMED5	transmembrane p24 trafficking protein 5	2.35978	0.163167	1.43 x 10-4
SLC22A4	solute carrier family 22 member 4	2.35804	0.418458	0.00106277
COL17A1	collagen type XVII alpha 1 chain	2.35132	0.434785	0.0031511
TMOD1	tropomodulin 1	2.35092	0.822537	0.039027
PPP1R3B	protein phosphatase 1 regulatory subunit 3B	2.3466	0.762194	0.0327745
PIK3R6	phosphoinositide-3-kinase regulatory subunit 6	2.34595	0.318414	0.00238066
GPX1	glutathione peroxidase 1	2.34095	0.436226	0.00142954
UBE2L6	ubiquitin conjugating enzyme E2 L6	2.3393	0.520478	0.00328881
LCP2	lymphocyte cytosolic protein 2	2.32931	0.515981	0.00363904
ARRDC4	arrestin domain containing 4	2.32249	0.481689	0.00282416
DERA	deoxyribose-phosphate aldolase	2.32024	0.324155	3.29 x 10-4
S100A16	S100 calcium binding protein A16	2.31764	0.303097	0.00278999
MCU	mitochondrial calcium uniporter	2.31428	0.734843	0.0388031
KIAA0040	KIAA0040	2.31419	0.502015	0.0141731
MAFF	MAF bZIP transcription factor F	2.30738	0.745928	0.0412229
ARAP2	ArfGAP with RhoGAP domain, ankyrin repeat and PH domain 2	2.30569	0.504356	0.00523776
SERPINB8	serpin family B member 8	2.30265	0.360937	0.00106625
TPK1	thiamin pyrophosphokinase 1	2.29839	0.73176	0.022649
SYT14	synaptotagmin 14	2.29638	0.518348	0.0091084
PHLDB2	pleckstrin homology like domain family B member 2	2.29172	0.810289	0.0403317
RAB9A	RAB9A, member RAS oncogene family	2.29142	0.383419	7.96 x 10-4
TIMP1	TIMP metallopeptidase inhibitor 1	2.28258	0.381564	0.00346067
APOL3	apolipoprotein L3	2.28183	0.666491	0.021075
ZC3HAV1	zinc finger CCCH-type containing, antiviral 1	2.27982	0.387832	0.00416199
AHNAK	AHNAK nucleoprotein	2.2773	0.807972	0.0273903
GNAI1	G protein subunit alpha i1	2.27014	0.653183	0.011873
PTPN6	protein tyrosine phosphatase, non-receptor type 6	2.26499	0.202367	2.41 x 10-5
KCNK1	potassium two pore domain channel subfamily K member 1	2.25733	0.553765	0.011736
IKZF1	IKAROS family zinc finger 1	2.25611	0.762793	0.025845
ERN1	endoplasmic reticulum to nucleus signaling 1	2.25152	0.681075	0.0294366
CAPG	capping actin protein, gelsolin like	2.25105	0.490426	0.00327708
JPH1	junctophilin 1	2.24439	0.750564	0.0228478
CHST2	carbohydrate sulfotransferase 2	2.24417	0.327792	8.62 x 10-4
LGMN	legumain	2.24406	0.321801	0.00359295
SLFN12L	schlafen family member 12 like	2.23928	0.755265	0.0224364
STK26	serine/threonine kinase 26	2.23334	0.699892	0.0164228
MAP7	microtubule associated protein 7	2.23189	0.681753	0.0360672
ST3GAL1	ST3 beta-galactoside alpha-2,3-sialyltransferase 1	2.23184	0.580685	0.00802938
UBASH3B	ubiquitin associated and SH3 domain containing B	2.22535	0.637781	0.0117648
SERPINA3	serpin family A member 3	2.22286	0.756295	0.0228771
EFCAB13	EF-hand calcium binding domain 13	2.22058	0.702957	0.0229939
PSMB9	proteasome subunit beta 9	2.2192	0.81842	0.032154
GPR174	G protein-coupled receptor 174	2.2149	0.829616	0.0386922
EDN1	endothelin 1	2.21287	0.317149	6.86 x 10-4
EMP3	epithelial membrane protein 3	2.20819	0.658514	0.0140709
SPTSSA	serine palmitoyltransferase small subunit A	2.2074	0.425547	0.00926871
KLRC4-KLRK1	KLRC4-KLRK1 readthrough	2.20669	0.769633	0.0316532
SEMA4D	semaphorin 4D	2.2056	0.345604	0.00100454
MCTP2	multiple C2 and transmembrane domain containing 2	2.20323	0.51977	0.00636717
ATP11A	ATPase phospholipid transporting 11A	2.20275	0.825126	0.0339521
ELL2	elongation factor for RNA polymerase II 2	2.19888	0.556763	0.00696211
PID1	phosphotyrosine interaction domain containing 1	2.18917	0.741356	0.0225574
APOL6	apolipoprotein L6	2.18878	0.405809	0.00362481
PTPRCAP	protein tyrosine phosphatase, receptor type C associated protein	2.18812	0.500423	0.00525901
RBFOX1	RNA binding protein, fox-1 homolog 1	2.18745	0.684133	0.0450626
B4GALNT1	beta-1,4-N-acetyl-galactosaminyltransferase 1	2.18591	0.465844	0.0113993
GPR82	G protein-coupled receptor 82	2.1845	0.656105	0.0143376
CRISP2	cysteine rich secretory protein 2	2.18331	0.705671	0.0266851
CBLB	Cbl proto-oncogene B	2.18122	0.446104	0.00840407
TNFRSF1A	TNF receptor superfamily member 1A	2.18114	0.59085	0.00945153
MPC1	mitochondrial pyruvate carrier 1	2.18101	0.571657	0.0147938
IL15RA	interleukin 15 receptor subunit alpha	2.1801	0.334798	0.00102585
CACNA1C	calcium voltage-gated channel subunit alpha1 C	2.17982	0.218356	5.73 x 10-5
LPIN3	lipin 3	2.17969	0.767109	0.0353007
SQOR	sulfide quinone oxidoreductase	2.17328	0.81385	0.0386408
GPR176	G protein-coupled receptor 176	2.16493	0.753983	0.0347674
RUNX1	runt related transcription factor 1	2.1622	0.574577	0.0155707
PER2	period circadian clock 2	2.15178	0.681281	0.026372
RAPH1	Ras association (RalGDS/AF-6) and pleckstrin homology domains 1	2.14984	0.527182	0.00832725
FYN	FYN proto-oncogene, Src family tyrosine kinase	2.14788	0.454462	0.00883201
RPS6KA5	ribosomal protein S6 kinase A5	2.14506	0.765247	0.0335303
MAP3K8	mitogen-activated protein kinase kinase kinase 8	2.14	0.60866	0.0170419
ATOH8	atonal bHLH transcription factor 8	2.13449	0.286568	0.00244944
APOE	apolipoprotein E	2.13414	0.709637	0.0216112
SLC31A2	solute carrier family 31 member 2	2.134	0.574531	0.00890699
ARHGEF6	Rac/Cdc42 guanine nucleotide exchange factor 6	2.13323	0.790829	0.0350367
LAPTM5	lysosomal protein transmembrane 5	2.13296	0.740329	0.0349677
LRMP	lymphoid restricted membrane protein	2.13154	0.830218	0.0405544
TRIB3	tribbles pseudokinase 3	2.12979	0.556882	0.0269729
C4orf32	chromosome 4 open reading frame 32	2.12648	0.351791	0.00602428
ARHGDIB	Rho GDP dissociation inhibitor beta	2.12272	0.653372	0.0283806
CX3CR1	C-X3-C motif chemokine receptor 1	2.11861	0.278739	0.00224929
NLRC5	NLR family CARD domain containing 5	2.11741	0.284146	3.07 x 10-4
RAB21	RAB21, member RAS oncogene family	2.11544	0.283588	4.79 x 10-4
STUM	stum, mechanosensory transduction mediator homolog	2.11491	0.452459	0.00761482
MYL9	myosin light chain 9	2.11485	0.724213	0.0366841
CDH13	cadherin 13	2.11427	0.827141	0.0496318
SDC4	syndecan 4	2.1073	0.66329	0.0294798
SELENOM	selenoprotein M	2.10286	0.488439	0.00738883
SBNO2	strawberry notch homolog 2	2.10052	0.704528	0.0399916
FAM198A	family with sequence similarity 198 member A	2.09886	0.842628	0.0441563
SLC2A8	solute carrier family 2 member 8	2.09697	0.784156	0.0363612
KCNJ8	potassium voltage-gated channel subfamily J member 8	2.09555	0.250382	7.31 x 10-4
CYSLTR1	cysteinyl leukotriene receptor 1	2.09538	0.827745	0.0419028
RASSF5	Ras association domain family member 5	2.09174	0.576701	0.0103034
STN1	STN1, CST complex subunit	2.08927	0.385361	0.00261499
CCR1	C-C motif chemokine receptor 1	2.08557	0.801865	0.0426961
DPYD	dihydropyrimidine dehydrogenase	2.0799	0.637736	0.0178628
LAT2	linker for activation of T-cells family member 2	2.07781	0.62934	0.0278821
CHRDL1	chordin like 1	2.073	0.803633	0.0487748
MACC1	MACC1, MET transcriptional regulator	2.0706	0.696975	0.0313269
SECISBP2L	SECIS binding protein 2 like	2.07017	0.767071	0.0413602
CD3E	CD3e molecule	2.06517	0.437955	0.00993069
RNF217	ring finger protein 217	2.06475	0.33014	7.24 x 10-4
PLEK	pleckstrin	2.06367	0.59829	0.0146435
TESC	tescalcin	2.06299	0.829506	0.0457339
CORO2A	coronin 2A	2.06166	0.342946	0.00167008
LMO2	LIM domain only 2	2.06068	0.361917	0.00685832
B3GALT4	beta-1,3-galactosyltransferase 4	2.05881	0.568475	0.0111374
RIOK3	RIO kinase 3	2.05798	0.288071	5.68 x 10-4
KCNAB3	potassium voltage-gated channel subfamily A regulatory beta subunit 3	2.05792	0.43288	0.00459054
AEBP1	AE binding protein 1	2.05479	0.573882	0.0110852
RAB11A	RAB11A, member RAS oncogene family	2.05297	0.531026	0.0245335
ZEB1	zinc finger E-box binding homeobox 1	2.05152	0.527583	0.00771321
DDO	D-aspartate oxidase	2.0469	0.585503	0.0125762
DENND3	DENN domain containing 3	2.04393	0.191067	3.51 x 10-4
TOM1	target of myb1 membrane trafficking protein	2.0409	0.30478	5.15 x 10-4
CGN	cingulin	2.03998	0.677907	0.0460937
BMP4	bone morphogenetic protein 4	2.03975	0.437707	0.00518492
ETHE1	ETHE1, persulfide dioxygenase	2.0342	0.645321	0.0193175
PYROXD1	pyridine nucleotide-disulphide oxidoreductase domain 1	2.03375	0.345727	0.00103176
MAPK6	mitogen-activated protein kinase 6	2.02862	0.389805	0.00834141
KSR1	kinase suppressor of ras 1	2.02676	0.494003	0.00684081
FMNL1	formin like 1	2.02269	0.265604	0.00116772
BTBD3	BTB domain containing 3	2.02128	0.53615	0.0124989
PRKCH	protein kinase C eta	2.0212	0.433892	0.003416
CYP11A1	cytochrome P450 family 11 subfamily A member 1	2.02069	0.467362	0.00592837
SNX21	sorting nexin family member 21	2.01878	0.333704	9.33 x 10-4
SVIL	supervillin	2.0165	0.512563	0.0075867
ITPKC	inositol-trisphosphate 3-kinase C	2.0115	0.399805	0.0114049
C16orf70	chromosome 16 open reading frame 70	2.00495	0.608377	0.0267534
SDC3	syndecan 3	2.00412	0.519346	0.00857571
KCNK3	potassium two pore domain channel subfamily K member 3	2.00394	0.204763	6.94 x 10-5
ABLIM3	actin binding LIM protein family member 3	2.00244	0.59607	0.0325683
YBX3	Y-box binding protein 3	2.00141	0.551206	0.0280204
CDH3	cadherin 3	1.99678	0.599539	0.0217096
UNC5CL	unc-5 family C-terminal like	1.99537	0.569764	0.0390697
VAT1	vesicle amine transport 1	1.995	0.563694	0.014715
TBCK	TBC1 domain containing kinase	1.9944	0.520793	0.0205108
VAMP8	vesicle associated membrane protein 8	1.99163	0.531307	0.0147593
MELTF	melanotransferrin	1.99123	0.688215	0.0330718
FAM129B	family with sequence similarity 129 member B	1.98926	0.721424	0.0384724
CTSA	cathepsin A	1.98895	0.353029	0.00275001
CSF1	colony stimulating factor 1	1.98809	0.372586	0.00332787
PCED1B	PC-esterase domain containing 1B	1.98484	0.327665	0.00216622
DPYSL2	dihydropyrimidinase like 2	1.98249	0.447871	0.00711613
MYD88	myeloid differentiation primary response 88	1.98219	0.360318	0.00156966
USP43	ubiquitin specific peptidase 43	1.97905	0.37504	0.00394091
ENDOD1	endonuclease domain containing 1	1.97739	0.355186	0.00348759
CALD1	caldesmon 1	1.97569	0.223545	3.04 x 10-4
TGFBR3	transforming growth factor beta receptor 3	1.97482	0.774434	0.0452844
P3H2	prolyl 3-hydroxylase 2	1.97474	0.545239	0.0116341
RIN2	Ras and Rab interactor 2	1.97452	0.387828	0.00556282
SH3BGRL3	SH3 domain binding glutamate rich protein like 3	1.97437	0.304807	0.00138401
SP110	SP110 nuclear body protein	1.9697	0.236356	3.63 x 10-4
S100A11	S100 calcium binding protein A11	1.9683	0.614208	0.0245249
FXYD6	FXYD domain containing ion transport regulator 6	1.96704	0.416785	0.00500372
PTGDR	prostaglandin D2 receptor	1.967	0.544927	0.0116204
IFI35	interferon induced protein 35	1.96259	0.570307	0.014325
PTPN7	protein tyrosine phosphatase, non-receptor type 7	1.9617	0.345041	0.00136552
TCEAL4	transcription elongation factor A like 4	1.96057	0.605722	0.0345519
EPHX1	epoxide hydrolase 1	1.95645	0.728569	0.0386093
C20orf27	chromosome 20 open reading frame 27	1.9564	0.487101	0.00747429
STAT3	signal transducer and activator of transcription 3	1.95624	0.592848	0.0181088
PIK3CG	phosphatidylinositol-4,5-bisphosphate 3-kinase catalytic subunit gamma	1.95017	0.615056	0.0206462
PPP1R14A	protein phosphatase 1 regulatory inhibitor subunit 14A	1.95006	0.536599	0.0187086
PRTG	protogenin	1.95002	0.652938	0.0334704
MZB1	marginal zone B and B1 cell specific protein	1.94965	0.287658	7.84 x 10-4
TMEM125	transmembrane protein 125	1.94922	0.713309	0.0384237
HIPK3	homeodomain interacting protein kinase 3	1.9457	0.206942	2.93 x 10-4
CDC25B	cell division cycle 25B	1.94382	0.566364	0.0152099
DUSP3	dual specificity phosphatase 3	1.94269	0.373721	0.00220174
ADCY3	adenylate cyclase 3	1.94234	0.572404	0.0159557
ACSL1	acyl-CoA synthetase long-chain family member 1	1.94123	0.483763	0.00793165
TNS1	tensin 1	1.94122	0.61863	0.025284
FNDC4	fibronectin type III domain containing 4	1.94063	0.576287	0.0163773
SFXN3	sideroflexin 3	1.94046	0.234623	0.00356326
GRN	granulin precursor	1.93973	0.668505	0.0298712
CNTROB	centrobin, centriole duplication and spindle assembly protein	1.93823	0.224853	6.80 x 10-4
SEPHS2	selenophosphate synthetase 2	1.93817	0.532908	0.0263409
GPRC5B	G protein-coupled receptor class C group 5 member B	1.93574	0.329608	0.00203671
PLEKHF1	pleckstrin homology and FYVE domain containing 1	1.93509	0.625608	0.0311338
CSF1R	colony stimulating factor 1 receptor	1.93417	0.58689	0.0453978
TMC8	transmembrane channel like 8	1.93394	0.413251	0.00400303
TWISTNB	TWIST neighbor	1.93382	0.530711	0.0137434
ITGB7	integrin subunit beta 7	1.93203	0.709108	0.0365672
PRRG1	proline rich and Gla domain 1	1.93163	0.288404	0.00576203
SERPINB9	serpin family B member 9	1.92995	0.28659	0.00563612
PPP3CC	protein phosphatase 3 catalytic subunit gamma	1.92974	0.188669	0.0010579
TGFA	transforming growth factor alpha	1.92883	0.386954	0.00275667
FGD4	FYVE, RhoGEF and PH domain containing 4	1.92851	0.666211	0.0309613
NEU1	neuraminidase 1	1.92777	0.572416	0.0234842
KCNJ16	potassium voltage-gated channel subfamily J member 16	1.92705	0.533873	0.0369289
MPP7	membrane palmitoylated protein 7	1.92471	0.690142	0.0481434
LITAF	lipopolysaccharide induced TNF factor	1.92273	0.476674	0.0140851
CMC1	C-X9-C motif containing 1	1.92105	0.603821	0.020593
HELZ	helicase with zinc finger	1.91862	0.673814	0.0326555
FCGBP	Fc fragment of IgG binding protein	1.91617	0.683148	0.0396106
SPHK1	sphingosine kinase 1	1.91469	0.521952	0.0158726
OSGIN2	oxidative stress induced growth inhibitor family member 2	1.91099	0.523659	0.0120858
LIMK2	LIM domain kinase 2	1.91001	0.41351	0.0139391
PSTK	phosphoseryl-tRNA kinase	1.90922	0.639133	0.0492991
AASS	aminoadipate-semialdehyde synthase	1.90817	0.469781	0.0092837
CCL21	C-C motif chemokine ligand 21	1.90764	0.327807	0.00332704
SBDS	SBDS, ribosome maturation factor	1.90622	0.23754	3.16 x 10-4
TTC39C	tetratricopeptide repeat domain 39C	1.90279	0.147062	1.85 x 10-5
CSTB	cystatin B	1.9026	0.586085	0.0212647
ARHGAP45	Rho GTPase activating protein 45	1.90063	0.658244	0.0457758
ITGAM	integrin subunit alpha M	1.89977	0.560286	0.0173954
ERO1A	endoplasmic reticulum oxidoreductase 1 alpha	1.89886	0.336651	0.00217035
SLC12A8	solute carrier family 12 member 8	1.89789	0.425179	0.00843285
IGSF11	immunoglobulin superfamily member 11	1.89635	0.585503	0.0424592
ASAH1	N-acylsphingosine amidohydrolase 1	1.89552	0.602458	0.0296963
CD7	CD7 molecule	1.89472	0.577431	0.0352464
MYZAP	myocardial zonula adherens protein	1.89171	0.462084	0.0101929
DIO3	iodothyronine deiodinase 3	1.89156	0.380845	0.00644569
SPN	sialophorin	1.88954	0.499512	0.0148845
CLIC1	chloride intracellular channel 1	1.88899	0.302543	0.00123828
TSPO	translocator protein	1.8874	0.364737	0.00260473
RAB40B	RAB40B, member RAS oncogene family	1.88041	0.537597	0.0326178
PDGFA	platelet derived growth factor subunit A	1.88041	0.512168	0.0179272
NOX4	NADPH oxidase 4	1.87858	0.529986	0.0175046
CRYBG1	crystallin beta-gamma domain containing 1	1.87758	0.62884	0.0288652
ORMDL2	ORMDL sphingolipid biosynthesis regulator 2	1.87728	0.57662	0.0303654
FGF2	fibroblast growth factor 2	1.87303	0.670785	0.0462613
FLNB	filamin B	1.87227	0.628099	0.0280478
USP25	ubiquitin specific peptidase 25	1.87222	0.177243	6.28 x 10-5
FLT3LG	fms related tyrosine kinase 3 ligand	1.87108	0.217737	3.22 x 10-4
DPH3	diphthamide biosynthesis 3	1.87106	0.415561	0.00522029
ST6GALNAC6	ST6 N-acetylgalactosaminide alpha-2,6-sialyltransferase 6	1.87046	0.152168	3.57 x 10-5
RILP	Rab interacting lysosomal protein	1.86985	0.497619	0.0123874
SLK	STE20 like kinase	1.86875	0.206132	1.29 x 10-4
PTPRU	protein tyrosine phosphatase, receptor type U	1.86671	0.552053	0.0256682
TSHZ2	teashirt zinc finger homeobox 2	1.86509	0.638414	0.0313857
FNBP1	formin binding protein 1	1.86254	0.215148	0.00243101
HPGDS	hematopoietic prostaglandin D synthase	1.86184	0.598776	0.0335303
CD38	CD38 molecule	1.86092	0.376612	0.00732591
GNG4	G protein subunit gamma 4	1.85928	0.279603	0.00336896
IRAK3	interleukin 1 receptor associated kinase 3	1.85809	0.274265	8.46 x 10-4
VRK3	vaccinia related kinase 3	1.85479	0.455862	0.0263665
MAFK	MAF bZIP transcription factor K	1.85387	0.451737	0.013746
ZBTB10	zinc finger and BTB domain containing 10	1.8525	0.246899	0.00320215
GATA6	GATA binding protein 6	1.85244	0.323932	0.00208978
PIK3IP1	phosphoinositide-3-kinase interacting protein 1	1.84957	0.397058	0.0056137
ITGAL	integrin subunit alpha L	1.84917	0.447809	0.00789844
DEGS1	delta 4-desaturase, sphingolipid 1	1.84898	0.289216	0.00100209
ENTPD5	ectonucleoside triphosphate diphosphohydrolase 5	1.8476	0.441352	0.0245191
RSC1A1	regulator of solute carriers 1	1.8438	0.412973	0.0106637
CST7	cystatin F	1.8432	0.403116	0.00481092
FXYD5	FXYD domain containing ion transport regulator 5	1.84052	0.402646	0.00616091
ADAM23	ADAM metallopeptidase domain 23	1.8395	0.342331	0.00998534
SETDB2-PHF11	SETDB2-PHF11 readthrough	1.83895	0.652988	0.0363155
PLIN2	perilipin 2	1.83842	0.413688	0.00917635
TRAPPC10	trafficking protein particle complex 10	1.83296	0.336406	0.00594675
ELMO1	engulfment and cell motility 1	1.83263	0.285813	8.98 x 10-4
PRKG2	protein kinase, cGMP-dependent, type II	1.83246	0.315163	0.0049575
TXK	TXK tyrosine kinase	1.83164	0.480289	0.0108888
HLA-E	major histocompatibility complex, class I, E	1.83162	0.487429	0.0135791
IFI16	interferon gamma inducible protein 16	1.82917	0.355158	0.00473018
CPEB4	cytoplasmic polyadenylation element binding protein 4	1.82857	0.254517	0.00184806
GFPT2	glutamine-fructose-6-phosphate transaminase 2	1.82764	0.452755	0.0286603
DDIT3	DNA damage inducible transcript 3	1.82598	0.314015	0.00164662
CAMKK1	calcium/calmodulin dependent protein kinase kinase 1	1.82561	0.708418	0.0496863
ADAM8	ADAM metallopeptidase domain 8	1.82343	0.544912	0.0287245
SIDT2	SID1 transmembrane family member 2	1.82214	0.566228	0.0237429
MYO1G	myosin IG	1.82198	0.689533	0.0484722
SGSM1	small G protein signaling modulator 1	1.82168	0.443014	0.0261509
DNAJB9	DnaJ heat shock protein family (Hsp40) member B9	1.82022	0.629933	0.0380077
IGFBP7	insulin like growth factor binding protein 7	1.81952	0.490379	0.0136243
BHLHE40	basic helix-loop-helix family member e40	1.8189	0.367309	0.00890981
BMP6	bone morphogenetic protein 6	1.81698	0.456528	0.0156205
ADGRL4	adhesion G protein-coupled receptor L4	1.81687	0.493275	0.0158215
GCH1	GTP cyclohydrolase 1	1.81686	0.524026	0.020435
ARRDC2	arrestin domain containing 2	1.81616	0.3955	0.00614372
LAMB1	laminin subunit beta 1	1.81451	0.661778	0.0462474
DUSP22	dual specificity phosphatase 22	1.81254	0.275635	0.00414817
RASAL3	RAS protein activator like 3	1.81173	0.372869	0.00907824
MEIS1	Meis homeobox 1	1.81087	0.508133	0.0157112
MFGE8	milk fat globule-EGF factor 8 protein	1.80975	0.526928	0.0187902
MYH11	myosin heavy chain 11	1.80941	0.548456	0.0208239
PSMB10	proteasome subunit beta 10	1.80744	0.526582	0.0176223
GNPTAB	N-acetylglucosamine-1-phosphate transferase alpha and beta subunits	1.80718	0.175894	1.18 x 10-4
SLC25A19	solute carrier family 25 member 19	1.80489	0.351321	0.00304636
GAB2	GRB2 associated binding protein 2	1.80447	0.287061	0.00516359
CFL2	cofilin 2	1.80428	0.28888	0.00330191
INHBB	inhibin beta B subunit	1.80336	0.551818	0.0227618
RASSF10	Ras association domain family member 10	1.80272	0.479937	0.0257603
EVI2B	ecotropic viral integration site 2B	1.80084	0.522235	0.017523
PPP1R36	protein phosphatase 1 regulatory subunit 36	1.80042	0.630686	0.042815
ENG	endoglin	1.79873	0.510764	0.0313451
LYPD3	LY6/PLAUR domain containing 3	1.7967	0.266352	0.00769223
FBXO8	F-box protein 8	1.79578	0.340546	0.00313121
SEC14L6	SEC14 like lipid binding 6	1.79346	0.448753	0.0249076
DSTN	destrin, actin depolymerizing factor	1.79262	0.380226	0.00601969
BLNK	B-cell linker	1.78894	0.257163	0.00266838
FAM13A	family with sequence similarity 13 member A	1.78673	0.375696	0.0124173
PBX3	PBX homeobox 3	1.78394	0.569998	0.0381672
GPR108	G protein-coupled receptor 108	1.78156	0.243773	0.00441584
TCEAL3	transcription elongation factor A like 3	1.77985	0.605724	0.0395083
ID2	inhibitor of DNA binding 2, HLH protein	1.77813	0.500744	0.020647
IRF1	interferon regulatory factor 1	1.77807	0.550222	0.0430295
MFHAS1	malignant fibrous histiocytoma amplified sequence 1	1.77767	0.523493	0.0197046
ADAP2	ArfGAP with dual PH domains 2	1.77744	0.476706	0.0287736
CASP4	caspase 4	1.77537	0.40787	0.00867039
CARD6	caspase recruitment domain family member 6	1.77521	0.109085	2.55 x 10-4
TTPAL	alpha tocopherol transfer protein like	1.775	0.349946	0.0114819
MISP	mitotic spindle positioning	1.77421	0.43412	0.0126648
ZHX3	zinc fingers and homeoboxes 3	1.77336	0.380883	0.0064118
SPSB1	splA/ryanodine receptor domain and SOCS box containing 1	1.77223	0.436884	0.0109932
PSD4	pleckstrin and Sec7 domain containing 4	1.76984	0.266522	0.00202124
SLC35F6	solute carrier family 35 member F6	1.76884	0.368732	0.00485414
GNE	glucosamine (UDP-N-acetyl)-2-epimerase/N-acetylmannosamine kinase	1.7665	0.364802	0.00410296
NAA20	N(alpha)-acetyltransferase 20, NatB catalytic subunit	1.7654	0.258997	0.00224575
NOS3	nitric oxide synthase 3	1.7653	0.547785	0.0411771
PAFAH2	platelet activating factor acetylhydrolase 2	1.76394	0.474874	0.0176806
PRKACB	protein kinase cAMP-activated catalytic subunit beta	1.76249	0.220595	3.42 x 10-4
SGMS1	sphingomyelin synthase 1	1.76078	0.292378	0.00248909
SIK2	salt inducible kinase 2	1.75959	0.457339	0.0150227
PLCD1	phospholipase C delta 1	1.75816	0.338048	0.00295354
GALNT11	polypeptide N-acetylgalactosaminyltransferase 11	1.75804	0.417241	0.0101524
PLEKHM1	pleckstrin homology and RUN domain containing M1	1.75507	0.368957	0.00482899
RIPOR2	RHO family interacting cell polarization regulator 2	1.75353	0.535113	0.0291745
EEA1	early endosome antigen 1	1.75238	0.253459	0.00393067
SELPLG	selectin P ligand	1.74945	0.612061	0.0396061
ATP6V0A1	ATPase H+ transporting V0 subunit a1	1.74727	0.322095	0.00260844
NCAM2	neural cell adhesion molecule 2	1.74606	0.449908	0.0226616
PRNP	prion protein	1.74501	0.515256	0.0252944
SLC10A6	solute carrier family 10 member 6	1.7444	0.348479	0.00603479
CEP126	centrosomal protein 126	1.74411	0.448212	0.012121
SLC2A9	solute carrier family 2 member 9	1.74411	0.482127	0.0168259
ABHD4	abhydrolase domain containing 4	1.74339	0.368707	0.00485028
NRBF2	nuclear receptor binding factor 2	1.74205	0.123868	2.47 x 10-5
ATP6V0E1	ATPase H+ transporting V0 subunit e1	1.7404	0.276012	0.00252194
RAPGEF3	Rap guanine nucleotide exchange factor 3	1.73822	0.604746	0.0484233
RNF19A	ring finger protein 19A, RBR E3 ubiquitin protein ligase	1.73747	0.152577	8.92 x 10-4
TRAK2	trafficking kinesin protein 2	1.73704	0.262597	0.00688544
IGFBP2	insulin like growth factor binding protein 2	1.73649	0.570456	0.0355227
TMEM245	transmembrane protein 245	1.73592	0.478955	0.020933
ECSCR	endothelial cell surface expressed chemotaxis and apoptosis regulator	1.73485	0.210039	2.77 x 10-4
TMEM43	transmembrane protein 43	1.73461	0.28257	0.00334109
FERMT2	fermitin family member 2	1.73382	0.405346	0.00882213
REEP5	receptor accessory protein 5	1.73354	0.139009	4.82 x 10-5
EVC	EvC ciliary complex subunit 1	1.72972	0.576499	0.0385329
SNX9	sorting nexin 9	1.72699	0.486371	0.0269191
SH3D19	SH3 domain containing 19	1.72664	0.516551	0.0239013
DNMBP	dynamin binding protein	1.72589	0.502195	0.0255204
TMEM187	transmembrane protein 187	1.7242	0.421317	0.0117067
RHOQ	ras homolog family member Q	1.72307	0.344766	0.00387843
RINL	Ras and Rab interactor like	1.72169	0.573951	0.0473258
APOBR	apolipoprotein B receptor	1.72167	0.424135	0.0129822
KLF3	Kruppel like factor 3	1.71994	0.364332	0.00613908
MAPK3	mitogen-activated protein kinase 3	1.71792	0.345305	0.00408469
TTC22	tetratricopeptide repeat domain 22	1.71678	0.596271	0.0489047
TMEM120A	transmembrane protein 120A	1.71634	0.289199	0.00786907
MSN	moesin	1.71548	0.488198	0.019584
SASH1	SAM and SH3 domain containing 1	1.71505	0.584073	0.0407971
CDKL2	cyclin dependent kinase like 2	1.71453	0.441185	0.0241442
USP47	ubiquitin specific peptidase 47	1.71452	0.276873	0.00470598
TRADD	TNFRSF1A associated via death domain	1.7143	0.463703	0.0153461
PLCG2	phospholipase C gamma 2	1.71372	0.463235	0.0156008
IGF2BP2	insulin like growth factor 2 mRNA binding protein 2	1.71312	0.48044	0.0208625
MTHFD2	methylenetetrahydrofolate dehydrogenase (NADP+ dependent) 2, methenyltetrahydrofolate cyclohydrolase	1.71208	0.476607	0.0383756
SLC1A5	solute carrier family 1 member 5	1.70812	0.480269	0.0266347
VSIR	V-set immunoregulatory receptor	1.70531	0.294484	0.00319225
SNTB1	syntrophin beta 1	1.7047	0.482222	0.0213988
SELENOK	selenoprotein K	1.70459	0.341083	0.00406513
MMP19	matrix metallopeptidase 19	1.7043	0.290138	0.0113077
CAPN2	calpain 2	1.70426	0.251499	0.001167
MALL	mal, T-cell differentiation protein like	1.70382	0.422072	0.0167136
RASGRP2	RAS guanyl releasing protein 2	1.70213	0.517564	0.0352135
DRAM1	DNA damage regulated autophagy modulator 1	1.70178	0.248816	0.00223791
VPS41	VPS41, HOPS complex subunit	1.70029	0.471171	0.0392771
MPZL3	myelin protein zero like 3	1.69937	0.512849	0.0450276
TSPAN33	tetraspanin 33	1.69906	0.560588	0.0356908
STK38	serine/threonine kinase 38	1.69889	0.242987	7.50 x 10-4
H1F0	H1 histone family member 0	1.69786	0.402521	0.011695
RUNX3	runt related transcription factor 3	1.69598	0.228015	8.32 x 10-4
MGST3	microsomal glutathione S-transferase 3	1.6953	0.417635	0.0298979
OPTN	optineurin	1.69415	0.380858	0.0122166
SERTAD1	SERTA domain containing 1	1.69376	0.520046	0.0392789
HIF1A	hypoxia inducible factor 1 alpha subunit	1.69339	0.23152	0.00304318
PARVG	parvin gamma	1.69162	0.478174	0.0197216
DUSP10	dual specificity phosphatase 10	1.69142	0.591648	0.0469685
PLCD3	phospholipase C delta 3	1.69089	0.453845	0.0316109
ELF4	E74 like ETS transcription factor 4	1.69056	0.43578	0.0133613
SLC10A3	solute carrier family 10 member 3	1.69018	0.212299	5.34 x 10-4
VAV1	vav 1 guanine nucleotide exchange factor	1.68789	0.557514	0.0413777
JOSD2	Josephin domain containing 2	1.6861	0.516271	0.0478892
BCL2L15	BCL2 like 15	1.68188	0.378182	0.00740745
CNPPD1	cyclin Pas1/PHO80 domain containing 1	1.6814	0.352149	0.0177163
RASAL1	RAS protein activator like 1	1.68094	0.366771	0.00684813
DAXX	death domain associated protein	1.67994	0.301759	0.00255851
APOL2	apolipoprotein L2	1.67951	0.550859	0.0350662
LACTB	lactamase beta	1.67791	0.555735	0.0431099
LTC4S	leukotriene C4 synthase	1.67629	0.476596	0.0216537
LAMC1	laminin subunit gamma 1	1.67578	0.36773	0.00923405
TLE2	transducin like enhancer of split 2	1.67431	0.241751	0.0030659
DRAXIN	dorsal inhibitory axon guidance protein	1.67339	0.456684	0.0437681
MMAA	methylmalonic aciduria (cobalamin deficiency) cblA type	1.67311	0.340752	0.0163907
RFFL	ring finger and FYVE like domain containing E3 ubiquitin protein ligase	1.67295	0.274233	0.0017253
TCEAL1	transcription elongation factor A like 1	1.67173	0.5256	0.0361575
PTPRM	protein tyrosine phosphatase, receptor type M	1.66907	0.427413	0.0292502
TMEM127	transmembrane protein 127	1.66638	0.556056	0.0447443
SWAP70	SWAP switching B-cell complex subunit 70	1.6663	0.303251	0.0030334
EMCN	endomucin	1.66588	0.321814	0.00932697
KRCC1	lysine rich coiled-coil 1	1.66549	0.26761	0.00428276
RFK	riboflavin kinase	1.6642	0.439849	0.016119
IL1RL2	interleukin 1 receptor like 2	1.66383	0.326437	0.00411785
PCGF1	polycomb group ring finger 1	1.66185	0.307457	0.00571981
INSR	insulin receptor	1.66027	0.534179	0.0339208
BBOF1	basal body orientation factor 1	1.65881	0.299098	0.0106484
ABHD14B	abhydrolase domain containing 14B	1.65851	0.341538	0.00875585
MAP1A	microtubule associated protein 1A	1.65732	0.472444	0.0217229
B3GNT2	UDP-GlcNAc:betaGal beta-1,3-N-acetylglucosaminyltransferase 2	1.65677	0.441682	0.0191428
SOAT1	sterol O-acyltransferase 1	1.65649	0.231445	9.71 x 10-4
C1RL	complement C1r subcomponent like	1.65282	0.403968	0.0146164
TCTA	T-cell leukemia translocation altered	1.6521	0.431686	0.0159795
MED13L	mediator complex subunit 13 like	1.64945	0.546185	0.0383612
IFRD1	interferon related developmental regulator 1	1.64873	0.213381	0.00233214
TTC39B	tetratricopeptide repeat domain 39B	1.64868	0.440938	0.0174563
RAB11FIP1	RAB11 family interacting protein 1	1.64819	0.524506	0.0489473
ZCCHC6	zinc finger CCHC-type containing 6	1.6468	0.228442	0.0015195
CDHR1	cadherin related family member 1	1.64596	0.504093	0.0295545
TRIP10	thyroid hormone receptor interactor 10	1.64382	0.354345	0.0122974
CRACR2A	calcium release activated channel regulator 2A	1.64133	0.307278	0.0168795
TPRG1L	tumor protein p63 regulated 1 like	1.64132	0.271749	0.0082116
BLOC1S5	biogenesis of lysosomal organelles complex 1 subunit 5	1.64016	0.303312	0.00349584
PISD	phosphatidylserine decarboxylase	1.6353	0.237986	0.00114641
PYGL	glycogen phosphorylase L	1.63452	0.378896	0.0240962
TP53INP2	tumor protein p53 inducible nuclear protein 2	1.63202	0.520067	0.0450293
TMCO3	transmembrane and coiled-coil domains 3	1.63173	0.182054	0.00242485
PTPRK	protein tyrosine phosphatase, receptor type K	1.62943	0.423635	0.0308893
KIF5A	kinesin family member 5A	1.62889	0.435058	0.0221148
ATP6V1B2	ATPase H+ transporting V1 subunit B2	1.62766	0.304261	0.00609445
HRASLS5	HRAS like suppressor family member 5	1.62753	0.272244	0.00301716
ADAMTSL4	ADAMTS like 4	1.62699	0.411758	0.0143467
TRAM1	translocation associated membrane protein 1	1.62572	0.250077	0.0014713
EPB41L3	erythrocyte membrane protein band 4.1 like 3	1.62515	0.313709	0.012851
STAT6	signal transducer and activator of transcription 6	1.62399	0.341492	0.0121106
JAK3	Janus kinase 3	1.62359	0.14208	9.41 x 10-5
TCIRG1	T-cell immune regulator 1, ATPase H+ transporting V0 subunit a3	1.6225	0.338719	0.0065942
DMTN	dematin actin binding protein	1.62083	0.473354	0.0487034
TMEM35B	transmembrane protein 35B	1.61855	0.330325	0.00695899
DENND4A	DENN domain containing 4A	1.61764	0.23065	0.00276487
ADAM9	ADAM metallopeptidase domain 9	1.61724	0.236606	0.00128161
S100A13	S100 calcium binding protein A13	1.61718	0.246065	0.00163352
CREBL2	cAMP responsive element binding protein like 2	1.61493	0.371377	0.00990602
ECE1	endothelin converting enzyme 1	1.61423	0.376063	0.0195559
CCDC149	coiled-coil domain containing 149	1.61079	0.243245	0.00356533
CHST11	carbohydrate sulfotransferase 11	1.61037	0.300947	0.00490004
PHACTR2	phosphatase and actin regulator 2	1.60967	0.295073	0.00350445
MTHFR	methylenetetrahydrofolate reductase	1.60673	0.386855	0.014311
PTK2B	protein tyrosine kinase 2 beta	1.60575	0.255328	0.00187194
CERK	ceramide kinase	1.60473	0.249856	0.00200655
CCDC71L	coiled-coil domain containing 71 like	1.60181	0.337473	0.00704968
ENO2	enolase 2	1.59978	0.298213	0.00698909
COL8A1	collagen type VIII alpha 1 chain	1.59837	0.522943	0.042619
STRADB	STE20-related kinase adaptor beta	1.59431	0.363728	0.0111804
PIWIL4	piwi like RNA-mediated gene silencing 4	1.59296	0.434199	0.0277992
ZDHHC13	zinc finger DHHC-type containing 13	1.59274	0.278987	0.00757288
PLEKHA1	pleckstrin homology domain containing A1	1.59269	0.511473	0.0401875
CST3	cystatin C	1.59187	0.50119	0.0371349
LIMA1	LIM domain and actin binding 1	1.59061	0.316643	0.010636
CHRAC1	chromatin accessibility complex 1	1.59033	0.263857	0.00834
FLVCR2	feline leukemia virus subgroup C cellular receptor family member 2	1.59028	0.434257	0.0298449
RBCK1	RANBP2-type and C3HC4-type zinc finger containing 1	1.58963	0.271091	0.0043819
ZFAND2A	zinc finger AN1-type containing 2A	1.58959	0.342834	0.013319
SETDB2	SET domain bifurcated 2	1.58922	0.447934	0.0349585
NAMPT	nicotinamide phosphoribosyltransferase	1.58902	0.501562	0.0381112
VAT1L	vesicle amine transport 1 like	1.58794	0.283408	0.0149616
PLN	phospholamban	1.58647	0.494676	0.0384428
INPP5D	inositol polyphosphate-5-phosphatase D	1.58644	0.31431	0.00673548
FERMT3	fermitin family member 3	1.58624	0.403453	0.0164168
NGEF	neuronal guanine nucleotide exchange factor	1.5861	0.27317	0.00446416
TNFAIP8L3	TNF alpha induced protein 8 like 3	1.58496	0.476813	0.0334941
IGSF3	immunoglobulin superfamily member 3	1.58465	0.388671	0.0206611
TLDC1	TBC/LysM-associated domain containing 1	1.58381	0.319815	0.016335
KLHL13	kelch like family member 13	1.58337	0.538965	0.0491017
UAP1	UDP-N-acetylglucosamine pyrophosphorylase 1	1.58325	0.166752	3.33 x 10-4
MTMR11	myotubularin related protein 11	1.58286	0.338082	0.0132623
RAP1B	RAP1B, member of RAS oncogene family	1.58251	0.402144	0.0349331
TMEM165	transmembrane protein 165	1.58148	0.221479	9.93 x 10-4
SLC22A23	solute carrier family 22 member 23	1.58082	0.48419	0.0427084
TRIOBP	TRIO and F-actin binding protein	1.58068	0.362188	0.0208362
PLCB2	phospholipase C beta 2	1.58001	0.345393	0.0087693
MAP1LC3B	microtubule associated protein 1 light chain 3 beta	1.57989	0.291198	0.00403349
IRF5	interferon regulatory factor 5	1.57985	0.236516	0.00155908
CPNE8	copine 8	1.57927	0.333599	0.00754355
ARHGEF1	Rho guanine nucleotide exchange factor 1	1.57883	0.237808	0.00838728
SERPINB1	serpin family B member 1	1.57835	0.272	0.00307395
SYNE3	spectrin repeat containing nuclear envelope family member 3	1.57826	0.343221	0.0266565
CTSB	cathepsin B	1.57732	0.509195	0.0422784
MINDY2	MINDY lysine 48 deubiquitinase 2	1.57402	0.352915	0.0161612
ACKR2	atypical chemokine receptor 2	1.57261	0.396367	0.0437942
SMPD1	sphingomyelin phosphodiesterase 1	1.57036	0.31912	0.00654744
ARPC2	actin related protein 2/3 complex subunit 2	1.57033	0.171414	3.88 x 10-4
GHR	growth hormone receptor	1.56974	0.405705	0.0433649
CYP4V2	cytochrome P450 family 4 subfamily V member 2	1.56924	0.244273	0.00224901
PPP1R11	protein phosphatase 1 regulatory inhibitor subunit 11	1.5668	0.159527	2.37 x 10-4
RHOG	ras homolog family member G	1.56663	0.264484	0.00277832
BTN3A2	butyrophilin subfamily 3 member A2	1.56663	0.333975	0.0225769
PLEKHO2	pleckstrin homology domain containing O2	1.5658	0.22717	0.00128269
NIPAL3	NIPA like domain containing 3	1.56503	0.464594	0.0366168
SFT2D2	SFT2 domain containing 2	1.56483	0.347834	0.0101586
SSFA2	sperm specific antigen 2	1.56438	0.462881	0.0332443
SLC30A1	solute carrier family 30 member 1	1.5643	0.270638	0.00326444
CLIP1	CAP-Gly domain containing linker protein 1	1.56324	0.377445	0.0256609
SERINC3	serine incorporator 3	1.56293	0.463526	0.0339652
FLT1	fms related tyrosine kinase 1	1.56239	0.336571	0.0123812
TRIM47	tripartite motif containing 47	1.56199	0.19802	0.00100326
CTBS	chitobiase	1.56137	0.286166	0.0058608
MYO1E	myosin IE	1.56121	0.306159	0.0106726
PCGF5	polycomb group ring finger 5	1.56109	0.248934	0.00378756
FLI1	Fli-1 proto-oncogene, ETS transcription factor	1.56061	0.29096	0.0100341
RAD54L2	RAD54-like 2 (S. cerevisiae)	1.56015	0.46239	0.044439
CORO6	coronin 6	1.5601	0.370052	0.0247223
ANKRD20A4	ankyrin repeat domain 20 family member A4	1.55966	0.389028	0.0337129
A2M	alpha-2-macroglobulin	1.55963	0.248026	0.00878246
BTBD6	BTB domain containing 6	1.55747	0.361397	0.015265
CCNDBP1	cyclin D1 binding protein 1	1.55364	0.267747	0.00385273
IL1RL1	interleukin 1 receptor like 1	1.55307	0.181472	0.00279721
KIF16B	kinesin family member 16B	1.55281	0.296078	0.00887442
VEGFC	vascular endothelial growth factor C	1.55205	0.377222	0.0153137
UBE2W	ubiquitin conjugating enzyme E2 W	1.55166	0.3311	0.0119556
MRPS18A	mitochondrial ribosomal protein S18A	1.55077	0.501465	0.0491133
TPT1	tumor protein, translationally-controlled 1	1.54939	0.247057	0.00231729
TMEM150C	transmembrane protein 150C	1.54877	0.487685	0.0492236
BABAM2	BRISC and BRCA1 A complex member 2	1.54787	0.260746	0.0130826
FCHO2	FCH domain only 2	1.54721	0.43378	0.0288168
SMOX	spermine oxidase	1.54673	0.398438	0.0213512
KREMEN1	kringle containing transmembrane protein 1	1.54665	0.176621	6.34 x 10-4
SRPX	sushi repeat containing protein, X-linked	1.54642	0.3812	0.0209493
CERS2	ceramide synthase 2	1.54557	0.250964	0.00303794
IP6K3	inositol hexakisphosphate kinase 3	1.54471	0.291263	0.0148989
RNASEL	ribonuclease L	1.54442	0.366325	0.0177604
WDFY3	WD repeat and FYVE domain containing 3	1.54127	0.420472	0.0254254
SLC35F5	solute carrier family 35 member F5	1.53966	0.281569	0.00451278
CORO1C	coronin 1C	1.53897	0.291585	0.00974308
FAAH2	fatty acid amide hydrolase 2	1.53874	0.39612	0.0397876
ROM1	retinal outer segment membrane protein 1	1.53801	0.195869	8.36 x 10-4
ADGRE5	adhesion G protein-coupled receptor E5	1.5377	0.314237	0.00807166
SLC27A3	solute carrier family 27 member 3	1.53725	0.413876	0.0355191
CRY2	cryptochrome circadian clock 2	1.53654	0.216273	0.00300055
RTN4	reticulon 4	1.53481	0.388015	0.0198522
IRF2	interferon regulatory factor 2	1.53479	0.390544	0.0206434
AHCY	adenosylhomocysteinase	1.53377	0.45622	0.039545
EPHA4	EPH receptor A4	1.53158	0.260277	0.0132233
CXXC5	CXXC finger protein 5	1.53101	0.366662	0.0180687
CYB5R1	cytochrome b5 reductase 1	1.52861	0.458557	0.0382766
ZCCHC2	zinc finger CCHC-type containing 2	1.52824	0.220481	0.00475768
REXO2	RNA exonuclease 2	1.52767	0.411212	0.0425927
ITGA1	integrin subunit alpha 1	1.52753	0.465149	0.0421297
ZDHHC7	zinc finger DHHC-type containing 7	1.52671	0.210548	0.00327616
BRI3	brain protein I3	1.52643	0.30358	0.0117179
PVRIG	poliovirus receptor related immunoglobulin domain containing	1.5251	0.401604	0.0325342
SNX20	sorting nexin 20	1.52493	0.352795	0.0195277
TRPV2	transient receptor potential cation channel subfamily V member 2	1.52486	0.390772	0.0211707
PNPLA8	patatin like phospholipase domain containing 8	1.52266	0.192807	7.63 x 10-4
NFE2L2	nuclear factor, erythroid 2 like 2	1.52172	0.311639	0.00827094
SKAP2	src kinase associated phosphoprotein 2	1.52127	0.176186	4.69 x 10-4
SIPA1L2	signal induced proliferation associated 1 like 2	1.52078	0.460491	0.0411026
EOGT	EGF domain specific O-linked N-acetylglucosamine transferase	1.5187	0.359298	0.0211516
CDC42SE2	CDC42 small effector 2	1.51851	0.369902	0.0172973
UTRN	utrophin	1.51837	0.436797	0.0356777
BCO2	beta-carotene oxygenase 2	1.51807	0.354172	0.0265024
SEC62	SEC62 homolog, preprotein translocation factor	1.51752	0.18156	0.00289863
SRI	sorcin	1.51722	0.21214	0.00497977
BAG3	BCL2 associated athanogene 3	1.5172	0.472855	0.0442689
MICU1	mitochondrial calcium uptake 1	1.51579	0.457871	0.0412118
BTN3A1	butyrophilin subfamily 3 member A1	1.51496	0.393234	0.0355932
PHF11	PHD finger protein 11	1.51477	0.18722	0.00173443
ELOVL1	ELOVL fatty acid elongase 1	1.51305	0.431256	0.0496645
SELP	selectin P	1.51277	0.322751	0.0204009
FAM167B	family with sequence similarity 167 member B	1.51264	0.424319	0.0350302
AAED1	AhpC/TSA antioxidant enzyme domain containing 1	1.51191	0.270626	0.00519151
ACVR1B	activin A receptor type 1B	1.51056	0.265333	0.0201016
PLA2G15	phospholipase A2 group XV	1.51052	0.317171	0.0128079
CRLF3	cytokine receptor like factor 3	1.50903	0.387479	0.0348475
DAGLB	diacylglycerol lipase beta	1.50756	0.347542	0.0235179
STAT5B	signal transducer and activator of transcription 5B	1.50443	0.299014	0.0238225
SLC39A13	solute carrier family 39 member 13	1.50366	0.234134	0.00396552
RGL3	ral guanine nucleotide dissociation stimulator like 3	1.50349	0.334119	0.0128209
PUDP	pseudouridine 5'-phosphatase	1.50339	0.207744	0.00929024
CTTNBP2NL	CTTNBP2 N-terminal like	1.50328	0.388519	0.0340345
RPH3AL	rabphilin 3A like (without C2 domains)	1.50319	0.26535	0.00614668
MIGA1	mitoguardin 1	1.50233	0.253373	0.00512328
STXBP1	syntaxin binding protein 1	1.50165	0.399659	0.0359104
B, Downregulated mRNAs
Gene_Symbol	Description	FC	FC-SD	p-value
ACTRT3	actin related protein T3	-1.50006	0.366237	0.018739
DNMT1	DNA methyltransferase 1	-1.50052	0.286008	0.00767041
CKAP5	cytoskeleton associated protein 5	-1.50079	0.315769	0.0204773
SEZ6L2	seizure related 6 homolog like 2	-1.50158	0.425412	0.0394255
RFX5	regulatory factor X5	-1.50174	0.216471	0.00316098
ADAM22	ADAM metallopeptidase domain 22	-1.50201	0.328786	0.0134816
SPA17	sperm autoantigenic protein 17	-1.50309	0.396594	0.0271343
MIS18BP1	MIS18 binding protein 1	-1.50433	0.45995	0.0428571
KBTBD12	kelch repeat and BTB domain containing 12	-1.50464	0.203052	0.00183099
ALDH18A1	aldehyde dehydrogenase 18 family member A1	-1.50474	0.290861	0.0184297
PIGW	phosphatidylinositol glycan anchor biosynthesis class W	-1.5051	0.334761	0.0127243
SMYD2	SET and MYND domain containing 2	-1.5051	0.304786	0.0229814
NINL	ninein like	-1.50546	0.218571	0.00391568
LSM5	LSM5 homolog, U6 small nuclear RNA and mRNA degradation associated	-1.50572	0.37588	0.0201284
HIST1H4K	histone cluster 1 H4 family member k	-1.50574	0.355163	0.0160271
SLC30A4	solute carrier family 30 member 4	-1.50581	0.189761	0.00347105
SRSF1	serine and arginine rich splicing factor 1	-1.50593	0.142346	3.61 x 10-4
MIB2	mindbomb E3 ubiquitin protein ligase 2	-1.50614	0.319924	0.0115131
AZIN2	antizyme inhibitor 2	-1.50689	0.251441	0.00397017
C5	complement C5	-1.50746	0.266683	0.0142817
DNMT3A	DNA methyltransferase 3 alpha	-1.50812	0.40057	0.0334249
ARHGAP35	Rho GTPase activating protein 35	-1.50836	0.436711	0.034895
CEP85	centrosomal protein 85	-1.50894	0.203798	0.00301191
HYLS1	HYLS1, centriolar and ciliogenesis associated	-1.50911	0.369594	0.0184539
DHRS11	dehydrogenase/reductase 11	-1.50985	0.33973	0.0149702
C3orf18	chromosome 3 open reading frame 18	-1.51024	0.451971	0.0393658
TPRKB	TP53RK binding protein	-1.51028	0.302208	0.0084241
CALML4	calmodulin like 4	-1.5112	0.246036	0.00795356
PARP2	poly(ADP-ribose) polymerase 2	-1.51158	0.28399	0.00893609
SMYD3	SET and MYND domain containing 3	-1.51167	0.326753	0.0112491
SLC25A15	solute carrier family 25 member 15	-1.51184	0.414283	0.0348443
HNRNPA1	heterogeneous nuclear ribonucleoprotein A1	-1.51203	0.201484	0.00120114
MSI2	musashi RNA binding protein 2	-1.51212	0.30147	0.0107001
ALYREF	Aly/REF export factor	-1.51249	0.483185	0.0484054
RAB39B	RAB39B, member RAS oncogene family	-1.51266	0.0898655	3.13 x 10-5
TULP4	tubby like protein 4	-1.51383	0.301462	0.0174649
AARS2	alanyl-tRNA synthetase 2, mitochondrial	-1.51427	0.448079	0.0433417
PLA2G12A	phospholipase A2 group XIIA	-1.51474	0.125575	1.30 x 10-4
MARC2	mitochondrial amidoxime reducing component 2	-1.51627	0.13681	7.06 x 10-4
HNRNPA0	heterogeneous nuclear ribonucleoprotein A0	-1.51852	0.353746	0.0168541
ZBED6CL	ZBED6 C-terminal like	-1.51963	0.348891	0.0245655
ALDH1B1	aldehyde dehydrogenase 1 family member B1	-1.5206	0.472555	0.0463324
GALNT5	polypeptide N-acetylgalactosaminyltransferase 5	-1.52119	0.38118	0.0496214
SLF1	SMC5-SMC6 complex localization factor 1	-1.52212	0.256948	0.0105171
PABPN1	poly(A) binding protein nuclear 1	-1.52291	0.213919	0.00174178
FIGNL1	fidgetin like 1	-1.52346	0.327729	0.0215792
TCERG1	transcription elongation regulator 1	-1.52353	0.208057	0.00112878
FAM161A	family with sequence similarity 161 member A	-1.52471	0.0822838	1.69 x 10-5
MACROD1	MACRO domain containing 1	-1.52584	0.421729	0.0336073
RRBP1	ribosome binding protein 1	-1.52595	0.369798	0.020009
C1orf112	chromosome 1 open reading frame 112	-1.52601	0.286179	0.00607169
ZNF35	zinc finger protein 35	-1.52616	0.170875	4.74 x 10-4
DCBLD2	discoidin, CUB and LCCL domain containing 2	-1.52621	0.228348	0.0024519
PDE9A	phosphodiesterase 9A	-1.52625	0.451531	0.0430543
PACRG	parkin coregulated	-1.52672	0.4944	0.0496487
CAPS2	calcyphosine 2	-1.52879	0.381998	0.0246001
KBTBD6	kelch repeat and BTB domain containing 6	-1.5291	0.345093	0.0138053
RBMS3	RNA binding motif single stranded interacting protein 3	-1.52998	0.494349	0.0476859
GRK3	G protein-coupled receptor kinase 3	-1.53062	0.335656	0.0200991
RPS6KA6	ribosomal protein S6 kinase A6	-1.53064	0.399254	0.0231098
LIN7B	lin-7 homolog B, crumbs cell polarity complex component	-1.53068	0.438181	0.0422754
SNRPF	small nuclear ribonucleoprotein polypeptide F	-1.53108	0.435127	0.0303061
WDR90	WD repeat domain 90	-1.53111	0.345861	0.0120586
D2HGDH	D-2-hydroxyglutarate dehydrogenase	-1.53126	0.366289	0.0155775
IFT27	intraflagellar transport 27	-1.53206	0.265746	0.0111027
TRAIP	TRAF interacting protein	-1.53229	0.243169	0.00477819
PGAP2	post-GPI attachment to proteins 2	-1.53237	0.298246	0.0133532
HSPE1	heat shock protein family E (Hsp10) member 1	-1.53265	0.462234	0.0372645
ZCCHC14	zinc finger CCHC-type containing 14	-1.53302	0.428915	0.038206
FAM13B	family with sequence similarity 13 member B	-1.5338	0.410582	0.0239398
MTHFD1	methylenetetrahydrofolate dehydrogenase, cyclohydrolase and formyltetrahydrofolate synthetase 1	-1.534	0.28036	0.0057089
DEK	DEK proto-oncogene	-1.53459	0.259049	0.0122672
IGFN1	immunoglobulin-like and fibronectin type III domain containing 1	-1.53474	0.130263	9.06 x 10-5
IQCC	IQ motif containing C	-1.53492	0.356931	0.0233457
GRAP	GRB2-related adaptor protein	-1.53567	0.503456	0.04923
FAH	fumarylacetoacetate hydrolase	-1.53568	0.425975	0.0290136
ZNF786	zinc finger protein 786	-1.53574	0.323095	0.0246409
CLHC1	clathrin heavy chain linker domain containing 1	-1.53701	0.16427	0.0033563
MZT1	mitotic spindle organizing protein 1	-1.53712	0.278261	0.00477428
OAF	out at first homolog	-1.53813	0.35755	0.0247744
ALDH3A2	aldehyde dehydrogenase 3 family member A2	-1.53818	0.285905	0.0117554
ZWILCH	zwilch kinetochore protein	-1.53846	0.272874	0.00446937
GAS2	growth arrest specific 2	-1.53941	0.430453	0.0382992
PHC1	polyhomeotic homolog 1	-1.54036	0.390836	0.0190916
DNAH6	dynein axonemal heavy chain 6	-1.54101	0.415034	0.0300456
FGF12	fibroblast growth factor 12	-1.54122	0.221385	0.00145958
ZNF280C	zinc finger protein 280C	-1.54194	0.0952219	1.80 x 10-5
PACSIN3	protein kinase C and casein kinase substrate in neurons 3	-1.54197	0.210093	0.00123459
CCDC171	coiled-coil domain containing 171	-1.54416	0.231443	0.00341946
CARS2	cysteinyl-tRNA synthetase 2, mitochondrial (putative)	-1.54454	0.164928	5.86 x 10-4
ZNF594	zinc finger protein 594	-1.54509	0.217412	0.0019746
PLEKHG1	pleckstrin homology and RhoGEF domain containing G1	-1.54536	0.379697	0.0188818
ANKRD50	ankyrin repeat domain 50	-1.54809	0.456264	0.0327056
KDM2B	lysine demethylase 2B	-1.54869	0.313268	0.007202
ZNF177	zinc finger protein 177	-1.54897	0.431019	0.0286379
HLTF	helicase like transcription factor	-1.55192	0.296987	0.0170369
C7orf57	chromosome 7 open reading frame 57	-1.55227	0.444886	0.0360999
SFPQ	splicing factor proline and glutamine rich	-1.55259	0.428473	0.0339169
DNALI1	dynein axonemal light intermediate chain 1	-1.55274	0.322978	0.0169654
DGKE	diacylglycerol kinase epsilon	-1.55342	0.46569	0.046983
NRG1	neuregulin 1	-1.55351	0.337705	0.0120552
PSMG1	proteasome assembly chaperone 1	-1.55472	0.274327	0.00852053
GCA	grancalcin	-1.55668	0.277013	0.00481783
HNRNPH1	heterogeneous nuclear ribonucleoprotein H1	-1.55669	0.341428	0.00963127
JARID2	jumonji and AT-rich interaction domain containing 2	-1.55703	0.303574	0.00687407
TEX10	testis expressed 10	-1.55724	0.135239	1.44 x 10-4
FBXO44	F-box protein 44	-1.55772	0.267627	0.0074666
MAGEF1	MAGE family member F1	-1.55914	0.377685	0.0218572
GPC2	glypican 2	-1.56018	0.38555	0.041362
FAM184A	family with sequence similarity 184 member A	-1.56042	0.217643	0.00340915
CACHD1	cache domain containing 1	-1.56138	0.424602	0.0231632
ALDH5A1	aldehyde dehydrogenase 5 family member A1	-1.56217	0.181043	8.56 x 10-4
STRIP2	striatin interacting protein 2	-1.56251	0.337876	0.0284357
ZNF114	zinc finger protein 114	-1.56288	0.426644	0.0392695
RALGPS2	Ral GEF with PH domain and SH3 binding motif 2	-1.56344	0.295673	0.00528218
TAS2R10	taste 2 receptor member 10	-1.56412	0.285946	0.00898373
SPRED1	sprouty related EVH1 domain containing 1	-1.56425	0.383004	0.0150321
COL9A3	collagen type IX alpha 3 chain	-1.56432	0.430335	0.0375241
EFNB3	ephrin B3	-1.56484	0.431887	0.0309813
CSE1L	chromosome segregation 1 like	-1.56587	0.196345	0.00158163
TSPYL5	TSPY like 5	-1.56591	0.453178	0.0296597
ADGRB2	adhesion G protein-coupled receptor B2	-1.56609	0.276542	0.0173991
SLFN12	schlafen family member 12	-1.56615	0.451361	0.0299352
TIPIN	TIMELESS interacting protein	-1.56673	0.402711	0.0252836
TBC1D32	TBC1 domain family member 32	-1.56757	0.214895	0.00156204
RFC2	replication factor C subunit 2	-1.56786	0.407842	0.040572
DTYMK	deoxythymidylate kinase	-1.56805	0.344846	0.0154016
CENPO	centromere protein O	-1.56817	0.443046	0.046675
LIN9	lin-9 DREAM MuvB core complex component	-1.56878	0.39217	0.0289683
SAMD15	sterile alpha motif domain containing 15	-1.56942	0.347074	0.0100666
POMK	protein-O-mannose kinase	-1.57099	0.407609	0.0191759
LOC100506127	putative uncharacterized protein FLJ37770-like	-1.571	0.217817	0.00103581
SASS6	SAS-6 centriolar assembly protein	-1.57146	0.216123	0.0041473
IL31RA	interleukin 31 receptor A	-1.57176	0.28502	0.0182219
CCDC18	coiled-coil domain containing 18	-1.57225	0.305076	0.00733074
DNM1	dynamin 1	-1.57227	0.50396	0.0450453
KCNQ1	potassium voltage-gated channel subfamily Q member 1	-1.57237	0.322284	0.0175606
PABPC1L	poly(A) binding protein cytoplasmic 1 like	-1.57258	0.479745	0.0455161
MASTL	microtubule associated serine/threonine kinase like	-1.57263	0.436084	0.0257253
TOMM34	translocase of outer mitochondrial membrane 34	-1.57308	0.423085	0.0228047
CBLC	Cbl proto-oncogene C	-1.57357	0.302451	0.00621868
PAGE4	PAGE family member 4	-1.57391	0.395238	0.0166533
PCBP4	poly(rC) binding protein 4	-1.57442	0.431559	0.0411516
GKAP1	G kinase anchoring protein 1	-1.57476	0.311848	0.0177947
PHTF2	putative homeodomain transcription factor 2	-1.57657	0.3167	0.0141557
PELI1	pellino E3 ubiquitin protein ligase 1	-1.57674	0.242536	0.00276787
PRKDC	protein kinase, DNA-activated, catalytic polypeptide	-1.57679	0.411625	0.018794
CEP128	centrosomal protein 128	-1.57714	0.304422	0.00994317
FRAT2	FRAT2, WNT signaling pathway regulator	-1.57755	0.271357	0.00899897
ZNF74	zinc finger protein 74	-1.57914	0.307156	0.00528955
CHD3	chromodomain helicase DNA binding protein 3	-1.58056	0.465583	0.031009
LOC728392	uncharacterized LOC728392	-1.58124	0.45059	0.0264067
CDC14A	cell division cycle 14A	-1.58126	0.45864	0.0297472
DMGDH	dimethylglycine dehydrogenase	-1.58129	0.478215	0.0354647
HOXB4	homeobox B4	-1.58136	0.503606	0.0395939
CEP70	centrosomal protein 70	-1.58237	0.472543	0.0379889
TMEM44	transmembrane protein 44	-1.58269	0.231408	0.00127212
ZNF282	zinc finger protein 282	-1.58341	0.206495	6.74 x 10-4
DBF4	DBF4 zinc finger	-1.5836	0.354129	0.0115163
PAICS	phosphoribosylaminoimidazole carboxylase and phosphoribosylaminoimidazolesuccinocarboxamide synthase	-1.58515	0.338832	0.0201456
ACADL	acyl-CoA dehydrogenase, long chain	-1.58573	0.432045	0.0240457
USP27X	ubiquitin specific peptidase 27, X-linked	-1.58589	0.295977	0.00965
MCM5	minichromosome maintenance complex component 5	-1.58608	0.259361	0.00236805
FGFR1OP	FGFR1 oncogene partner	-1.58649	0.22113	0.00148224
ZSCAN2	zinc finger and SCAN domain containing 2	-1.5868	0.364294	0.0129887
PSMC3IP	PSMC3 interacting protein	-1.58716	0.335543	0.0198389
SEPHS1	selenophosphate synthetase 1	-1.58743	0.308448	0.00549675
MFSD3	major facilitator superfamily domain containing 3	-1.58862	0.383185	0.01331
PTDSS1	phosphatidylserine synthase 1	-1.58892	0.237675	0.00154841
NPDC1	neural proliferation, differentiation and control 1	-1.58911	0.341974	0.00907263
CYB5R2	cytochrome b5 reductase 2	-1.59024	0.377737	0.0139674
GLRX5	glutaredoxin 5	-1.59076	0.372097	0.011867
FADS2	fatty acid desaturase 2	-1.59083	0.41918	0.0187247
RBM24	RNA binding motif protein 24	-1.59097	0.447196	0.0251706
QSER1	glutamine and serine rich 1	-1.59326	0.335246	0.00725392
INCENP	inner centromere protein	-1.59366	0.331629	0.00918095
NUDT10	nudix hydrolase 10	-1.59435	0.5161	0.0406029
ABI2	abl interactor 2	-1.59441	0.434878	0.0252942
CASC1	cancer susceptibility 1	-1.59551	0.380902	0.0149414
TSC22D1	TSC22 domain family member 1	-1.59564	0.481019	0.033186
MMS22L	MMS22 like, DNA repair protein	-1.59579	0.297425	0.00460968
CCND1	cyclin D1	-1.59747	0.532462	0.0481694
C8orf33	chromosome 8 open reading frame 33	-1.59849	0.228321	0.00257515
ZNF682	zinc finger protein 682	-1.59919	0.217027	9.96 x 10-4
HACD4	3-hydroxyacyl-CoA dehydratase 4	-1.59944	0.467288	0.0335067
KDM1A	lysine demethylase 1A	-1.60138	0.143191	1.80 x 10-4
POLA1	DNA polymerase alpha 1, catalytic subunit	-1.60142	0.151252	2.94 x 10-4
AFF2	AF4/FMR2 family member 2	-1.60204	0.360805	0.0314091
TRAF3IP2	TRAF3 interacting protein 2	-1.60231	0.543941	0.0481538
DFNB59	deafness, autosomal recessive 59	-1.60268	0.408565	0.0209549
MARK1	microtubule affinity regulating kinase 1	-1.60302	0.410388	0.0312986
CCDC102A	coiled-coil domain containing 102A	-1.6035	0.336201	0.0103812
CCNB1IP1	cyclin B1 interacting protein 1	-1.60374	0.260615	0.0044235
FAM227A	family with sequence similarity 227 member A	-1.60511	0.375245	0.0110246
ZNF286B	zinc finger protein 286B	-1.60616	0.223846	9.02 x 10-4
PRKD1	protein kinase D1	-1.60723	0.324565	0.0100804
DUT	deoxyuridine triphosphatase	-1.60734	0.200827	0.00106618
NPM1	nucleophosmin	-1.60787	0.135944	5.59 x 10-5
EGFLAM	EGF like, fibronectin type III and laminin G domains	-1.61042	0.478318	0.0305602
TCF3	transcription factor 3	-1.61132	0.445989	0.0215748
TARBP1	TAR (HIV-1) RNA binding protein 1	-1.6118	0.219883	8.63 x 10-4
EDA2R	ectodysplasin A2 receptor	-1.61269	0.298029	0.00759683
ZCCHC18	zinc finger CCHC-type containing 18	-1.61284	0.30405	0.0046233
ZRANB3	zinc finger RANBP2-type containing 3	-1.6133	0.261784	0.00196544
HOXA9	homeobox A9	-1.6146	0.39436	0.0306551
ZFYVE21	zinc finger FYVE-type containing 21	-1.61523	0.444179	0.0337918
HDGFL2	HDGF like 2	-1.61616	0.339046	0.00732837
AGMAT	agmatinase	-1.61833	0.430227	0.0205503
EXTL2	exostosin like glycosyltransferase 2	-1.61854	0.365117	0.00945288
TTC3	tetratricopeptide repeat domain 3	-1.61921	0.325529	0.00525991
TMEM117	transmembrane protein 117	-1.61947	0.356238	0.00894756
FKBP9	FK506 binding protein 9	-1.62088	0.358818	0.00819619
KIAA0754	KIAA0754	-1.62118	0.408027	0.0155081
LRRC20	leucine rich repeat containing 20	-1.62173	0.327002	0.00612128
PREX1	phosphatidylinositol-3,4,5-trisphosphate dependent Rac exchange factor 1	-1.62218	0.423971	0.0170094
ZFP14	ZFP14 zinc finger protein	-1.6228	0.362972	0.0112135
OGFOD1	2-oxoglutarate and iron dependent oxygenase domain containing 1	-1.62282	0.551158	0.0451974
MYO15B	myosin XVB	-1.62334	0.549136	0.0438075
CDCA4	cell division cycle associated 4	-1.6239	0.238029	0.00167361
SYCP2	synaptonemal complex protein 2	-1.62426	0.293822	0.00990478
ZNF239	zinc finger protein 239	-1.62436	0.297301	0.010505
NKD1	naked cuticle homolog 1	-1.62511	0.31328	0.00945327
HIST3H2A	histone cluster 3 H2A	-1.6253	0.524428	0.038733
KIF7	kinesin family member 7	-1.62767	0.32434	0.00521375
MAP2	microtubule associated protein 2	-1.6292	0.306673	0.0141146
THEM6	thioesterase superfamily member 6	-1.62952	0.417381	0.0150465
P3H1	prolyl 3-hydroxylase 1	-1.62982	0.422575	0.0172675
AJAP1	adherens junctions associated protein 1	-1.62985	0.509405	0.0483812
B3GNT5	UDP-GlcNAc:betaGal beta-1,3-N-acetylglucosaminyltransferase 5	-1.63017	0.309925	0.00390527
PTPRN2	protein tyrosine phosphatase, receptor type N2	-1.6311	0.515939	0.0340671
PLGRKT	plasminogen receptor with a C-terminal lysine	-1.63235	0.489826	0.0281634
CPSF6	cleavage and polyadenylation specific factor 6	-1.63249	0.379421	0.0234987
BRAT1	BRCA1 associated ATM activator 1	-1.63548	0.368287	0.0138626
GRIA2	glutamate ionotropic receptor AMPA type subunit 2	-1.63569	0.461756	0.0409025
UBE2E3	ubiquitin conjugating enzyme E2 E3	-1.63648	0.361075	0.00815451
RBBP7	RB binding protein 7, chromatin remodeling factor	-1.63702	0.272756	0.00198789
LDHB	lactate dehydrogenase B	-1.63793	0.461943	0.0247728
GPRASP1	G protein-coupled receptor associated sorting protein 1	-1.63841	0.38241	0.0215469
LRP5	LDL receptor related protein 5	-1.6447	0.507584	0.0364606
MNS1	meiosis specific nuclear structural 1	-1.64564	0.317762	0.00426432
HACD3	3-hydroxyacyl-CoA dehydratase 3	-1.64739	0.237816	9.47 x 10-4
HNRNPAB	heterogeneous nuclear ribonucleoprotein A/B	-1.64745	0.291881	0.00530961
ZNF117	zinc finger protein 117	-1.64833	0.439552	0.0171704
PRIM2	primase (DNA) subunit 2	-1.64957	0.208514	9.20 x 10-4
ANP32E	acidic nuclear phosphoprotein 32 family member E	-1.64988	0.191407	3.21 x 10-4
C5orf34	chromosome 5 open reading frame 34	-1.65129	0.226137	0.00167065
HES4	hes family bHLH transcription factor 4	-1.65166	0.421761	0.0149687
FAM136A	family with sequence similarity 136 member A	-1.6517	0.175913	2.10 x 10-4
CKAP4	cytoskeleton associated protein 4	-1.65174	0.28491	0.00236028
SLC25A1	solute carrier family 25 member 1	-1.65283	0.467535	0.0238505
DLG3	discs large MAGUK scaffold protein 3	-1.65479	0.188702	4.26 x 10-4
ARMT1	acidic residue methyltransferase 1	-1.65481	0.491815	0.0291859
KBTBD7	kelch repeat and BTB domain containing 7	-1.65488	0.171674	4.59 x 10-4
MYO3B	myosin IIIB	-1.6549	0.302486	0.00525704
CCDC74A	coiled-coil domain containing 74A	-1.65537	0.459543	0.0194668
CHCHD6	coiled-coil-helix-coiled-coil-helix domain containing 6	-1.65581	0.562534	0.0425512
ZNF793	zinc finger protein 793	-1.65645	0.104644	2.23 x 10-5
CCDC136	coiled-coil domain containing 136	-1.6565	0.269271	0.002248
HMGN1	high mobility group nucleosome binding domain 1	-1.65665	0.218518	6.56 x 10-4
PARP1	poly(ADP-ribose) polymerase 1	-1.65675	0.340737	0.0103892
SLC22A17	solute carrier family 22 member 17	-1.65686	0.464542	0.036245
GGT6	gamma-glutamyltransferase 6	-1.65739	0.140986	0.00110835
SLC25A5	solute carrier family 25 member 5	-1.65948	0.326513	0.0123446
GABRB3	gamma-aminobutyric acid type A receptor beta3 subunit	-1.65983	0.40315	0.0125191
SGK3	serum/glucocorticoid regulated kinase family member 3	-1.66193	0.495427	0.0346134
C2orf15	chromosome 2 open reading frame 15	-1.66315	0.304194	0.00357684
DLX6	distal-less homeobox 6	-1.66397	0.452921	0.0227622
SLC35F2	solute carrier family 35 member F2	-1.66415	0.329532	0.00596477
HMGCS1	3-hydroxy-3-methylglutaryl-CoA synthase 1	-1.66451	0.493033	0.0346852
UQCC2	ubiquinol-cytochrome c reductase complex assembly factor 2	-1.66508	0.444974	0.0164784
ZNF713	zinc finger protein 713	-1.66533	0.297122	0.00258444
GCSH	glycine cleavage system protein H	-1.66675	0.390754	0.0101081
RASSF8	Ras association domain family member 8	-1.66714	0.550153	0.036528
IGDCC4	immunoglobulin superfamily DCC subclass member 4	-1.66721	0.174237	0.00246432
FZD2	frizzled class receptor 2	-1.66733	0.350242	0.0155691
MYB	MYB proto-oncogene, transcription factor	-1.66745	0.587738	0.0497486
HS6ST1	heparan sulfate 6-O-sulfotransferase 1	-1.66824	0.483982	0.0224923
KLHL22	kelch like family member 22	-1.66898	0.380358	0.0112674
NUDT21	nudix hydrolase 21	-1.67024	0.287794	0.00235061
TVP23C-CDRT4	TVP23C-CDRT4 readthrough	-1.6703	0.258238	0.00177802
IFFO2	intermediate filament family orphan 2	-1.67165	0.177914	5.54 x 10-4
CCDC150	coiled-coil domain containing 150	-1.67294	0.353329	0.0136404
FAM111A	family with sequence similarity 111 member A	-1.67427	0.346101	0.00553357
ETFRF1	electron transfer flavoprotein regulatory factor 1	-1.67452	0.377776	0.00871926
ZNF93	zinc finger protein 93	-1.67541	0.304881	0.00287022
CDK2	cyclin dependent kinase 2	-1.67543	0.32374	0.00377973
KL	klotho	-1.67674	0.450828	0.0253345
NEO1	neogenin 1	-1.67685	0.352676	0.00808158
GLDC	glycine decarboxylase	-1.67868	0.448313	0.0250611
CCDC34	coiled-coil domain containing 34	-1.67958	0.363965	0.00934705
POLA2	DNA polymerase alpha 2, accessory subunit	-1.68021	0.257768	0.00748474
ZNF625	zinc finger protein 625	-1.68312	0.26171	0.00683165
ST8SIA2	ST8 alpha-N-acetyl-neuraminide alpha-2,8-sialyltransferase 2	-1.68336	0.392159	0.0308776
CDH24	cadherin 24	-1.68399	0.221301	0.00343007
PTCH2	patched 2	-1.68405	0.522686	0.0342233
CHAF1B	chromatin assembly factor 1 subunit B	-1.68481	0.306875	0.00289939
SPRY1	sprouty RTK signaling antagonist 1	-1.68659	0.458058	0.0242293
DONSON	downstream neighbor of SON	-1.68732	0.240527	0.00351656
H2AFV	H2A histone family member V	-1.69072	0.201487	2.87 x 10-4
TM7SF3	transmembrane 7 superfamily member 3	-1.69226	0.373394	0.006612
KAT14	lysine acetyltransferase 14	-1.69286	0.169772	1.25 x 10-4
C14orf37	chromosome 14 open reading frame 37	-1.69379	0.549994	0.0422962
PRKAR1B	protein kinase cAMP-dependent type I regulatory subunit beta	-1.69405	0.358848	0.00679121
SACS	sacsin molecular chaperone	-1.6946	0.272157	0.0025967
DYNLL2	dynein light chain LC8-type 2	-1.69653	0.367654	0.00719236
TCAF1	TRPM8 channel associated factor 1	-1.69823	0.426937	0.0124807
PLPP2	phospholipid phosphatase 2	-1.69962	0.311296	0.00305866
TMEM206	transmembrane protein 206	-1.70055	0.509884	0.0323878
RAVER2	ribonucleoprotein, PTB binding 2	-1.70067	0.274598	0.00624773
WISP1	WNT1 inducible signaling pathway protein 1	-1.70084	0.531462	0.0325797
ISYNA1	inositol-3-phosphate synthase 1	-1.70158	0.454445	0.0358132
RTN4R	reticulon 4 receptor	-1.70195	0.437749	0.0144718
DBP	D-box binding PAR bZIP transcription factor	-1.70507	0.36894	0.00586538
TRIM6	tripartite motif containing 6	-1.7057	0.387829	0.00876332
TWSG1	twisted gastrulation BMP signaling modulator 1	-1.70585	0.481108	0.0200461
BARD1	BRCA1 associated RING domain 1	-1.70665	0.507069	0.0273868
CHAF1A	chromatin assembly factor 1 subunit A	-1.70792	0.30896	0.00296345
LRP12	LDL receptor related protein 12	-1.70892	0.571697	0.0366143
IKZF2	IKAROS family zinc finger 2	-1.70901	0.583001	0.0424095
CHRNA3	cholinergic receptor nicotinic alpha 3 subunit	-1.70998	0.42598	0.0309809
ME1	malic enzyme 1	-1.71005	0.409679	0.0161613
RFC5	replication factor C subunit 5	-1.71199	0.279222	0.00873829
GNG11	G protein subunit gamma 11	-1.71272	0.601221	0.0452333
MYEF2	myelin expression factor 2	-1.71601	0.378939	0.0212581
NIPSNAP1	nipsnap homolog 1	-1.71696	0.338832	0.00397443
FANCG	Fanconi anemia complementation group G	-1.71804	0.213951	0.00107504
EDAR	ectodysplasin A receptor	-1.72066	0.365961	0.0203077
ECI1	enoyl-CoA delta isomerase 1	-1.72277	0.547834	0.0289693
ZNF334	zinc finger protein 334	-1.72355	0.306504	0.00359584
RBM14-RBM4	RBM14-RBM4 readthrough	-1.72577	0.58626	0.0450071
CA8	carbonic anhydrase 8	-1.72625	0.455016	0.0252245
GABRA3	gamma-aminobutyric acid type A receptor alpha3 subunit	-1.72726	0.301739	0.00466908
ITPR2	inositol 1,4,5-trisphosphate receptor type 2	-1.72891	0.59441	0.038209
BEX3	brain expressed X-linked 3	-1.73356	0.366415	0.00544983
CBX2	chromobox 2	-1.73431	0.281847	0.00220313
RIBC2	RIB43A domain with coiled-coils 2	-1.73465	0.184271	3.76 x 10-4
ARMC3	armadillo repeat containing 3	-1.73484	0.471068	0.0171636
SPIN1	spindlin 1	-1.73501	0.550731	0.0319676
CCDC170	coiled-coil domain containing 170	-1.73558	0.582175	0.0463035
ELK1	ELK1, ETS transcription factor	-1.73581	0.331909	0.0046741
LCLAT1	lysocardiolipin acyltransferase 1	-1.7375	0.338781	0.00350001
DACT1	dishevelled binding antagonist of beta catenin 1	-1.7377	0.630773	0.0449456
SYT11	synaptotagmin 11	-1.73993	0.558008	0.029512
TRIM22	tripartite motif containing 22	-1.74162	0.383059	0.0100136
NELL2	neural EGFL like 2	-1.74193	0.426911	0.0215742
HEXB	hexosaminidase subunit beta	-1.74249	0.344791	0.0102893
SNAP91	synaptosome associated protein 91	-1.74327	0.459146	0.0166701
NUCKS1	nuclear casein kinase and cyclin dependent kinase substrate 1	-1.74405	0.127314	1.56 x 10-5
VANGL2	VANGL planar cell polarity protein 2	-1.74636	0.361439	0.0048881
MZT2A	mitotic spindle organizing protein 2A	-1.74646	0.242111	0.00186083
KIF26B	kinesin family member 26B	-1.74661	0.437243	0.0218125
SNRNP70	small nuclear ribonucleoprotein U1 subunit 70	-1.74717	0.480786	0.0253388
ULBP3	UL16 binding protein 3	-1.74721	0.52195	0.0215513
LRP3	LDL receptor related protein 3	-1.74793	0.170781	2.20 x 10-4
KIF27	kinesin family member 27	-1.74798	0.303722	0.00207485
HK2	hexokinase 2	-1.74848	0.594281	0.0368654
ARSJ	arylsulfatase family member J	-1.74934	0.380665	0.00910829
NCAPH	non-SMC condensin I complex subunit H	-1.74948	0.478457	0.0157302
RANBP1	RAN binding protein 1	-1.75102	0.273237	0.00109272
XRCC3	X-ray repair cross complementing 3	-1.75272	0.220272	6.70 x 10-4
MTBP	MDM2 binding protein	-1.7536	0.289116	0.00151369
HES6	hes family bHLH transcription factor 6	-1.75447	0.536913	0.0266595
PYROXD2	pyridine nucleotide-disulphide oxidoreductase domain 2	-1.75458	0.546841	0.0329344
MLLT3	MLLT3, super elongation complex subunit	-1.75474	0.322185	0.00741446
HMCN1	hemicentin 1	-1.75544	0.437663	0.0120126
KIF26A	kinesin family member 26A	-1.75568	0.634851	0.0484328
CD320	CD320 molecule	-1.75584	0.504746	0.0210135
DSCC1	DNA replication and sister chromatid cohesion 1	-1.75672	0.375521	0.00497081
SKP2	S-phase kinase associated protein 2	-1.75705	0.288612	0.00138913
C9orf16	chromosome 9 open reading frame 16	-1.75869	0.580736	0.0438243
PROM2	prominin 2	-1.75928	0.228384	0.001072
FNDC1	fibronectin type III domain containing 1	-1.75976	0.302447	0.00858408
TIMELESS	timeless circadian clock	-1.7605	0.410297	0.0106825
ILF3	interleukin enhancer binding factor 3	-1.76104	0.374512	0.00606557
CCDC8	coiled-coil domain containing 8	-1.76213	0.410246	0.00849643
ACAT2	acetyl-CoA acetyltransferase 2	-1.76229	0.559328	0.0320155
CXADR	CXADR, Ig-like cell adhesion molecule	-1.76364	0.452913	0.0230235
BRI3BP	BRI3 binding protein	-1.76368	0.398932	0.00998238
RAC3	ras-related C3 botulinum toxin substrate 3 (rho family, small GTP binding protein Rac3)	-1.76426	0.344844	0.0081784
NNAT	neuronatin	-1.76676	0.473648	0.0153537
PPA1	pyrophosphatase (inorganic) 1	-1.76699	0.250603	0.0050941
LHFPL2	lipoma HMGIC fusion partner-like 2	-1.76737	0.47149	0.0220149
APOL4	apolipoprotein L4	-1.76824	0.351616	0.00503345
ELP3	elongator acetyltransferase complex subunit 3	-1.76948	0.661916	0.0475991
PLEK2	pleckstrin 2	-1.7696	0.460644	0.0252746
ZNF300	zinc finger protein 300	-1.77006	0.467424	0.0127033
TYRO3	TYRO3 protein tyrosine kinase	-1.77327	0.413989	0.0200892
MORC4	MORC family CW-type zinc finger 4	-1.7733	0.230629	0.00391894
CTNNB1	catenin beta 1	-1.77349	0.202471	0.00327256
HIBCH	3-hydroxyisobutyryl-CoA hydrolase	-1.7767	0.454883	0.0144233
RMI2	RecQ mediated genome instability 2	-1.77845	0.496544	0.0233516
NIPAL1	NIPA like domain containing 1	-1.77871	0.27282	9.10 x 10-4
TVP23C	trans-golgi network vesicle protein 23 homolog C	-1.77932	0.340143	0.00534293
ARHGEF40	Rho guanine nucleotide exchange factor 40	-1.78002	0.434466	0.00886805
DPYSL3	dihydropyrimidinase like 3	-1.78154	0.41477	0.00723444
VMAC	vimentin-type intermediate filament associated coiled-coil protein	-1.78333	0.304853	0.00262819
TGIF2	TGFB induced factor homeobox 2	-1.78859	0.465452	0.0113308
PXYLP1	2-phosphoxylose phosphatase 1	-1.78921	0.437365	0.0170763
FANCA	Fanconi anemia complementation group A	-1.79384	0.553828	0.0232157
C1QTNF2	C1q and TNF related 2	-1.79506	0.46136	0.0230107
HIST1H2BC	histone cluster 1 H2B family member c	-1.79726	0.349564	0.0028834
PGD	phosphogluconate dehydrogenase	-1.79852	0.469491	0.013491
TENM3	teneurin transmembrane protein 3	-1.80253	0.493548	0.0336386
HIC1	HIC ZBTB transcriptional repressor 1	-1.80334	0.53486	0.0255485
FAM198B	family with sequence similarity 198 member B	-1.80471	0.534616	0.0270718
ARHGEF19	Rho guanine nucleotide exchange factor 19	-1.80495	0.197222	0.00166242
HOXA10	homeobox A10	-1.80506	0.394958	0.00715125
EPHB3	EPH receptor B3	-1.80535	0.466452	0.0106537
ZNF428	zinc finger protein 428	-1.80536	0.564368	0.0236264
LRRTM1	leucine rich repeat transmembrane neuronal 1	-1.8064	0.367149	0.00487184
ELOVL4	ELOVL fatty acid elongase 4	-1.80732	0.366867	0.00610801
EML5	echinoderm microtubule associated protein like 5	-1.80741	0.123149	1.01 x 10-5
RNF144A	ring finger protein 144A	-1.80812	0.681181	0.0462874
C12orf45	chromosome 12 open reading frame 45	-1.80908	0.366791	0.00910175
OBSCN	obscurin, cytoskeletal calmodulin and titin-interacting RhoGEF	-1.81277	0.273002	7.60 x 10-4
SYNDIG1	synapse differentiation inducing 1	-1.81433	0.325769	0.00963203
RIMS1	regulating synaptic membrane exocytosis 1	-1.81436	0.512299	0.0426018
E2F2	E2F transcription factor 2	-1.81458	0.345502	0.00257992
ARHGAP11B	Rho GTPase activating protein 11B	-1.81556	0.483121	0.0130177
NCAPD3	non-SMC condensin II complex subunit D3	-1.81557	0.230881	8.52 x 10-4
PASK	PAS domain containing serine/threonine kinase	-1.81664	0.218844	0.00160974
SAMHD1	SAM and HD domain containing deoxynucleoside triphosphate triphosphohydrolase 1	-1.81702	0.398143	0.0171644
DDIT4L	DNA damage inducible transcript 4 like	-1.81931	0.45816	0.0257312
CCT6B	chaperonin containing TCP1 subunit 6B	-1.8195	0.506894	0.0144791
LRRC4B	leucine rich repeat containing 4B	-1.82073	0.47792	0.0118056
PDS5B	PDS5 cohesin associated factor B	-1.82254	0.347568	0.0132282
ZNF711	zinc finger protein 711	-1.82308	0.281353	0.00210274
MAGED4	MAGE family member D4	-1.82473	0.267481	0.00159155
SHROOM4	shroom family member 4	-1.82509	0.319002	0.0049085
HMCES	5-hydroxymethylcytosine (hmC) binding, ES cell-specific	-1.82677	0.294731	0.00156257
CIART	circadian associated repressor of transcription	-1.8268	0.594591	0.034298
CBX1	chromobox 1	-1.82747	0.411806	0.00559515
HOXA11	homeobox A11	-1.83196	0.637488	0.0338161
GOLGA6L9	golgin A6 family-like 9	-1.83438	0.55946	0.0398818
CENPL	centromere protein L	-1.83711	0.358614	0.00391186
CCNE1	cyclin E1	-1.83823	0.454658	0.0083605
NLGN3	neuroligin 3	-1.83839	0.224652	4.06 x 10-4
VRK1	vaccinia related kinase 1	-1.83911	0.333694	0.00329131
KNTC1	kinetochore associated 1	-1.84051	0.377681	0.00747674
ZNF138	zinc finger protein 138	-1.84056	0.207305	1.47 x 10-4
NAP1L3	nucleosome assembly protein 1 like 3	-1.84251	0.585012	0.0308155
PIF1	PIF1 5'-to-3' DNA helicase	-1.84268	0.503582	0.0128277
COL3A1	collagen type III alpha 1 chain	-1.84334	0.659667	0.0368985
ZAK	sterile alpha motif and leucine zipper containing kinase AZK	-1.84514	0.34416	0.00431907
PRIM1	primase (DNA) subunit 1	-1.84638	0.493966	0.0171084
BEND5	BEN domain containing 5	-1.84714	0.253426	0.00139499
STIL	SCL/TAL1 interrupting locus	-1.85174	0.465681	0.015785
ZNF714	zinc finger protein 714	-1.85292	0.543312	0.0361989
CCDC85C	coiled-coil domain containing 85C	-1.85674	0.316684	0.00369602
DDX11	DEAD/H-box helicase 11	-1.8608	0.369257	0.00361343
ZGRF1	zinc finger GRF-type containing 1	-1.86127	0.543076	0.0244681
INPP5F	inositol polyphosphate-5-phosphatase F	-1.86131	0.494606	0.0114934
ZNF483	zinc finger protein 483	-1.86181	0.584122	0.0281265
PHLDA3	pleckstrin homology like domain family A member 3	-1.86736	0.351673	0.00457502
NDUFC2	NADH:ubiquinone oxidoreductase subunit C2	-1.86791	0.28042	0.00243177
TUSC3	tumor suppressor candidate 3	-1.86836	0.482274	0.0138574
CEP131	centrosomal protein 131	-1.86855	0.343088	0.00290995
RLN2	relaxin 2	-1.86857	0.491089	0.0282218
HAUS1	HAUS augmin like complex subunit 1	-1.87242	0.36188	0.00589201
VWDE	von Willebrand factor D and EGF domains	-1.8729	0.289196	0.00256027
NRIP1	nuclear receptor interacting protein 1	-1.87313	0.548792	0.0177684
GSG2	germ cell associated 2, haspin	-1.8741	0.302168	0.00122852
DGKH	diacylglycerol kinase eta	-1.87469	0.696915	0.0480264
CCDC14	coiled-coil domain containing 14	-1.87789	0.507235	0.0197651
DUSP15	dual specificity phosphatase 15	-1.88065	0.535852	0.0349989
ANKRD45	ankyrin repeat domain 45	-1.88107	0.395868	0.0171677
LIG1	DNA ligase 1	-1.88143	0.242299	5.31 x 10-4
ATP23	ATP23 metallopeptidase and ATP synthase assembly factor homolog	-1.88169	0.489967	0.009823
GJC1	gap junction protein gamma 1	-1.88417	0.307876	0.00111457
HIST1H1C	histone cluster 1 H1 family member c	-1.88435	0.376707	0.00664187
SLC29A4	solute carrier family 29 member 4	-1.88628	0.261469	0.00364552
PLBD1	phospholipase B domain containing 1	-1.88676	0.379022	0.00299704
TRO	trophinin	-1.88677	0.371506	0.00820081
ITGA8	integrin subunit alpha 8	-1.88824	0.394802	0.00358971
METTL21A	methyltransferase like 21A	-1.88861	0.272395	5.31 x 10-4
POC1B	POC1 centriolar protein B	-1.8888	0.399645	0.00422963
ITGB3BP	integrin subunit beta 3 binding protein	-1.89007	0.476534	0.0142249
NMT2	N-myristoyltransferase 2	-1.89148	0.367336	0.00946071
CHGA	chromogranin A	-1.89193	0.425559	0.00932902
HIST2H2AA3	histone cluster 2 H2A family member a3	-1.89345	0.312182	0.00180571
SH3YL1	SH3 and SYLF domain containing 1	-1.8985	0.598295	0.0252557
LRRC45	leucine rich repeat containing 45	-1.89884	0.286794	0.00258492
ZNF90	zinc finger protein 90	-1.89891	0.211839	0.00151497
XXYLT1	xyloside xylosyltransferase 1	-1.90002	0.225486	5.14 x 10-4
TCF4	transcription factor 4	-1.90053	0.303111	0.00129366
AZIN1	antizyme inhibitor 1	-1.90078	0.502176	0.0102823
TMTC1	transmembrane and tetratricopeptide repeat containing 1	-1.90164	0.53804	0.0137027
NME4	NME/NM23 nucleoside diphosphate kinase 4	-1.90652	0.595597	0.0214661
FAM162B	family with sequence similarity 162 member B	-1.90679	0.619289	0.0286873
CAMK4	calcium/calmodulin dependent protein kinase IV	-1.90765	0.570594	0.037996
ZNF788	zinc finger family member 788	-1.91041	0.391876	0.0050056
RFC4	replication factor C subunit 4	-1.91352	0.359767	0.00278825
COCH	cochlin	-1.91749	0.237356	0.00155432
NDC1	NDC1 transmembrane nucleoporin	-1.91776	0.226365	1.69 x 10-4
ST6GALNAC3	ST6 N-acetylgalactosaminide alpha-2,6-sialyltransferase 3	-1.9202	0.727604	0.0445043
HADH	hydroxyacyl-CoA dehydrogenase	-1.92094	0.250745	0.00209722
IQCA1	IQ motif containing with AAA domain 1	-1.92551	0.336631	0.00153211
HIST1H2BK	histone cluster 1 H2B family member k	-1.92863	0.276629	8.72 x 10-4
HIST1H4F	histone cluster 1 H4 family member f	-1.93015	0.476704	0.0165644
TRIM45	tripartite motif containing 45	-1.93037	0.337289	0.00250769
AUNIP	aurora kinase A and ninein interacting protein	-1.93186	0.252542	0.00238772
GAMT	guanidinoacetate N-methyltransferase	-1.93354	0.500191	0.00929324
SLC16A12	solute carrier family 16 member 12	-1.93431	0.494203	0.0202875
QPRT	quinolinate phosphoribosyltransferase	-1.93573	0.467464	0.00691313
SLC16A9	solute carrier family 16 member 9	-1.93826	0.656888	0.0271218
CKS1B	CDC28 protein kinase regulatory subunit 1B	-1.94093	0.491963	0.0109139
ELFN1	extracellular leucine rich repeat and fibronectin type III domain containing 1	-1.94242	0.344976	0.00146602
AADAT	aminoadipate aminotransferase	-1.94294	0.489792	0.0112915
RPL39L	ribosomal protein L39 like	-1.9447	0.489089	0.00940118
RNF157	ring finger protein 157	-1.94671	0.30494	0.00294326
SCRN2	secernin 2	-1.94834	0.370625	0.00440813
CDT1	chromatin licensing and DNA replication factor 1	-1.94935	0.302167	8.05 x 10-4
RNF207	ring finger protein 207	-1.95024	0.292984	6.62 x 10-4
FOLH1	folate hydrolase 1	-1.9503	0.602533	0.0260595
ZNF516	zinc finger protein 516	-1.95077	0.666869	0.0291922
CAP2	CAP, adenylate cyclase-associated protein, 2 (yeast)	-1.95214	0.595368	0.0226238
PCDH19	protocadherin 19	-1.95378	0.501672	0.0162335
KLK2	kallikrein related peptidase 2	-1.95581	0.105375	2.85 x 10-4
DNAJC9	DnaJ heat shock protein family (Hsp40) member C9	-1.95662	0.173678	0.0011146
DNAH14	dynein axonemal heavy chain 14	-1.95798	0.244943	9.83 x 10-4
ACBD7	acyl-CoA binding domain containing 7	-1.95837	0.322397	0.0016204
FH	fumarate hydratase	-1.95862	0.51243	0.0139028
MAGED4B	MAGE family member D4B	-1.95981	0.638455	0.0450573
LOXL1	lysyl oxidase like 1	-1.96006	0.271438	5.48 x 10-4
EDNRA	endothelin receptor type A	-1.96156	0.468613	0.0124845
SLC18B1	solute carrier family 18 member B1	-1.96322	0.591615	0.0385414
NLGN1	neuroligin 1	-1.96611	0.531854	0.0110817
PRICKLE1	prickle planar cell polarity protein 1	-1.96824	0.401468	0.00283974
COL26A1	collagen type XXVI alpha 1 chain	-1.97385	0.469408	0.00581859
PIP5KL1	phosphatidylinositol-4-phosphate 5-kinase like 1	-1.97385	0.491092	0.0182396
KIAA1211	KIAA1211	-1.97385	0.465791	0.0115088
POC1A	POC1 centriolar protein A	-1.97388	0.376515	0.0027159
NEMP1	nuclear envelope integral membrane protein 1	-1.97632	0.4186	0.00349112
SIPA1L1	signal induced proliferation associated 1 like 1	-1.97669	0.522552	0.0148755
KIF24	kinesin family member 24	-1.97732	0.213431	9.86 x 10-5
LGALSL	galectin like	-1.98123	0.307215	6.87 x 10-4
SV2C	synaptic vesicle glycoprotein 2C	-1.98949	0.618624	0.0483157
ARHGEF39	Rho guanine nucleotide exchange factor 39	-1.99387	0.404542	0.00276929
CNTLN	centlein	-1.99437	0.48469	0.00651281
NHS	NHS actin remodeling regulator	-1.99536	0.654976	0.0244621
CCDC138	coiled-coil domain containing 138	-1.99912	0.199063	9.09 x 10-5
HIST1H4E	histone cluster 1 H4 family member e	-2.00014	0.225909	1.15 x 10-4
PKP2	plakophilin 2	-2.00382	0.70936	0.0406138
CENPX	centromere protein X	-2.00652	0.362585	0.00174446
ST6GAL2	ST6 beta-galactoside alpha-2,6-sialyltransferase 2	-2.00687	0.657156	0.0358739
PRR11	proline rich 11	-2.0103	0.414596	0.00319444
ARMCX4	armadillo repeat containing, X-linked 4	-2.01053	0.44014	0.00509759
SPECC1	sperm antigen with calponin homology and coiled-coil domains 1	-2.01058	0.52359	0.0121073
HIST1H3E	histone cluster 1 H3 family member e	-2.01305	0.456633	0.00458942
AURKB	aurora kinase B	-2.01418	0.704036	0.028547
ZNF726	zinc finger protein 726	-2.0149	0.440138	0.00444142
DNAJC10	DnaJ heat shock protein family (Hsp40) member C10	-2.01508	0.483579	0.0123121
GINS1	GINS complex subunit 1	-2.01756	0.493303	0.00917189
MEX3A	mex-3 RNA binding family member A	-2.01902	0.605972	0.0252195
SEMA3G	semaphorin 3G	-2.02274	0.496347	0.0128965
ID3	inhibitor of DNA binding 3, HLH protein	-2.02439	0.570954	0.0138143
PAM	peptidylglycine alpha-amidating monooxygenase	-2.02474	0.653172	0.0262014
PLA1A	phospholipase A1 member A	-2.02533	0.571034	0.0261038
RMI1	RecQ mediated genome instability 1	-2.02871	0.549622	0.0298515
CIT	citron rho-interacting serine/threonine kinase	-2.02912	0.681314	0.0276008
PSIP1	PC4 and SFRS1 interacting protein 1	-2.02938	0.243679	0.00116672
DSN1	DSN1 homolog, MIS12 kinetochore complex component	-2.03015	0.352009	0.00456969
FANCL	Fanconi anemia complementation group L	-2.0314	0.408596	0.0075414
TSPAN6	tetraspanin 6	-2.03669	0.604348	0.0149312
GLRB	glycine receptor beta	-2.04172	0.752907	0.0339383
SLC39A8	solute carrier family 39 member 8	-2.04597	0.801878	0.049901
NEURL1B	neuralized E3 ubiquitin protein ligase 1B	-2.0465	0.377771	0.00516915
CHEK1	checkpoint kinase 1	-2.04732	0.360306	0.0057531
STXBP5L	syntaxin binding protein 5 like	-2.04874	0.246881	8.33 x 10-4
COLCA1	colorectal cancer associated 1	-2.05368	0.64804	0.0455808
KIF22	kinesin family member 22	-2.05597	0.428233	0.00952811
E2F8	E2F transcription factor 8	-2.05892	0.51163	0.00664997
STC2	stanniocalcin 2	-2.06236	0.480277	0.0216919
POLD1	DNA polymerase delta 1, catalytic subunit	-2.06364	0.442367	0.00628719
FAM13C	family with sequence similarity 13 member C	-2.06461	0.194664	7.68 x 10-5
EYA2	EYA transcriptional coactivator and phosphatase 2	-2.06603	0.837064	0.0471791
TUBB2B	tubulin beta 2B class IIb	-2.0672	0.707621	0.0461492
GDF11	growth differentiation factor 11	-2.07029	0.486583	0.0107748
PDGFRL	platelet derived growth factor receptor like	-2.07245	0.683614	0.0218864
NSD2	nuclear receptor binding SET domain protein 2	-2.07291	0.448015	0.00423372
SMC2	structural maintenance of chromosomes 2	-2.07555	0.417761	0.0047802
TPBG	trophoblast glycoprotein	-2.07829	0.648469	0.0303613
EZH2	enhancer of zeste 2 polycomb repressive complex 2 subunit	-2.08268	0.57834	0.0184
CNTNAP3	contactin associated protein-like 3	-2.08583	0.432356	0.00729268
CCNF	cyclin F	-2.08785	0.401122	0.00218204
SARDH	sarcosine dehydrogenase	-2.08847	0.484113	0.00841703
NASP	nuclear autoantigenic sperm protein	-2.08893	0.276079	3.32 x 10-4
ITGA9	integrin subunit alpha 9	-2.08949	0.428865	0.00538884
PTK7	protein tyrosine kinase 7 (inactive)	-2.09334	0.281942	3.63 x 10-4
VASH2	vasohibin 2	-2.09636	0.536832	0.0207833
SQLE	squalene epoxidase	-2.09766	0.49169	0.00489854
OLFM2	olfactomedin 2	-2.10087	0.299406	5.22 x 10-4
NCAPD2	non-SMC condensin I complex subunit D2	-2.10257	0.524288	0.0245439
MCM8	minichromosome maintenance 8 homologous recombination repair factor	-2.10263	0.323229	0.00406387
FGFR3	fibroblast growth factor receptor 3	-2.10268	0.667424	0.0279858
POLE2	DNA polymerase epsilon 2, accessory subunit	-2.10324	0.379993	0.00180933
MCM6	minichromosome maintenance complex component 6	-2.10445	0.298261	4.96 x 10-4
C4orf19	chromosome 4 open reading frame 19	-2.1057	0.549326	0.00823646
CDCA5	cell division cycle associated 5	-2.10683	0.347239	8.21 x 10-4
REXO5	RNA exonuclease 5	-2.10786	0.684726	0.0200165
ARHGAP26	Rho GTPase activating protein 26	-2.11435	0.778339	0.0377653
TMEM56	transmembrane protein 56	-2.11698	0.395262	0.00186884
CBLN2	cerebellin 2 precursor	-2.11778	0.457046	0.00572766
ZNF732	zinc finger protein 732	-2.11935	0.280215	6.60 x 10-4
TMSB15B	thymosin beta 15B	-2.11944	0.728397	0.0274092
RCN2	reticulocalbin 2	-2.12132	0.241025	0.00150662
ATAD5	ATPase family, AAA domain containing 5	-2.12239	0.299984	0.00140665
SMO	smoothened, frizzled class receptor	-2.12583	0.375335	0.0012082
SHC2	SHC adaptor protein 2	-2.126	0.619293	0.013197
NMU	neuromedin U	-2.12613	0.423135	0.00714803
GPRASP2	G protein-coupled receptor associated sorting protein 2	-2.12839	0.580412	0.00971381
SULT1C4	sulfotransferase family 1C member 4	-2.13122	0.389424	0.00496355
ZCCHC11	zinc finger CCHC-type containing 11	-2.13519	0.382049	0.0012285
ARL15	ADP ribosylation factor like GTPase 15	-2.13654	0.605014	0.0286296
SLC12A2	solute carrier family 12 member 2	-2.13942	0.69679	0.0268525
DPY19L1	dpy-19 like 1	-2.14139	0.458301	0.00881031
LIMCH1	LIM and calponin homology domains 1	-2.14291	0.333223	0.00131
ERICH5	glutamate rich 5	-2.14448	0.266944	1.89 x 10-4
SSX2IP	SSX family member 2 interacting protein	-2.14571	0.31153	4.60 x 10-4
SLC1A4	solute carrier family 1 member 4	-2.14679	0.564697	0.0260675
RGS7	regulator of G protein signaling 7	-2.14875	0.396567	0.00861545
KNSTRN	kinetochore localized astrin/SPAG5 binding protein	-2.14999	0.533481	0.0112266
HIST2H2BE	histone cluster 2 H2B family member e	-2.15164	0.320295	0.0052201
PAQR4	progestin and adipoQ receptor family member 4	-2.15222	0.294009	0.00177028
MYL6B	myosin light chain 6B	-2.15285	0.410199	0.00188874
FAM234B	family with sequence similarity 234 member B	-2.15457	0.662244	0.0387678
COL9A2	collagen type IX alpha 2 chain	-2.16101	0.655956	0.0165277
CEP78	centrosomal protein 78	-2.16222	0.147731	2.77 x 10-4
AMOT	angiomotin	-2.16281	0.698966	0.0205064
MGARP	mitochondria localized glutamic acid rich protein	-2.16288	0.725468	0.0479038
BRCA2	BRCA2, DNA repair associated	-2.1632	0.558228	0.00994932
RAD51	RAD51 recombinase	-2.16713	0.457406	0.00982776
REC8	REC8 meiotic recombination protein	-2.16975	0.476976	0.007528
RCC2	regulator of chromosome condensation 2	-2.17051	0.369101	0.0021555
HIST1H1E	histone cluster 1 H1 family member e	-2.17067	0.320761	4.53 x 10-4
RECQL4	RecQ like helicase 4	-2.17083	0.291311	0.00209588
CHTF18	chromosome transmission fidelity factor 18	-2.17172	0.287985	0.0017323
FAM124B	family with sequence similarity 124 member B	-2.17235	0.772613	0.0372173
DHCR7	7-dehydrocholesterol reductase	-2.17501	0.65108	0.014143
RRM1	ribonucleotide reductase catalytic subunit M1	-2.17616	0.386186	0.00866038
CDCA7L	cell division cycle associated 7 like	-2.19086	0.413105	0.00204181
SFXN2	sideroflexin 2	-2.19093	0.468684	0.00694673
ROBO2	roundabout guidance receptor 2	-2.19167	0.558378	0.0261301
FLNC	filamin C	-2.19261	0.494293	0.0037618
NCAPG2	non-SMC condensin II complex subunit G2	-2.19343	0.345961	6.31 x 10-4
RAD54L	RAD54 like (S. cerevisiae)	-2.19542	0.512454	0.00443844
TACC3	transforming acidic coiled-coil containing protein 3	-2.19543	0.453981	0.00458006
CACNA1D	calcium voltage-gated channel subunit alpha1 D	-2.19582	0.666828	0.0216324
WDHD1	WD repeat and HMG-box DNA binding protein 1	-2.19666	0.495383	0.0115058
SPTBN2	spectrin beta, non-erythrocytic 2	-2.19858	0.490946	0.00524605
BHMT2	betaine--homocysteine S-methyltransferase 2	-2.19923	0.304161	0.00116428
ASRGL1	asparaginase like 1	-2.19974	0.794434	0.031291
TBX3	T-box 3	-2.20108	0.64668	0.012516
TMEM97	transmembrane protein 97	-2.20313	0.496733	0.00903739
ERVMER34-1	endogenous retrovirus group MER34 member 1, envelope	-2.20389	0.426884	0.00486014
PFKFB4	6-phosphofructo-2-kinase/fructose-2,6-biphosphatase 4	-2.20438	0.260061	8.74 x 10-4
EME1	essential meiotic structure-specific endonuclease 1	-2.20619	0.360797	7.79 x 10-4
FGF13	fibroblast growth factor 13	-2.20623	0.332059	6.43 x 10-4
HIST4H4	histone cluster 4 H4	-2.20818	0.387623	0.00236489
OCIAD2	OCIA domain containing 2	-2.21049	0.321261	5.25 x 10-4
KIAA1456	KIAA1456	-2.21249	0.784881	0.0492328
PLCG1	phospholipase C gamma 1	-2.21422	0.523814	0.0101914
H2AFZ	H2A histone family member Z	-2.21722	0.313867	8.13 x 10-4
PHF21B	PHD finger protein 21B	-2.21917	0.596661	0.00845512
HMGN2	high mobility group nucleosomal binding domain 2	-2.21933	0.283799	0.00173786
KCNMB4	potassium calcium-activated channel subfamily M regulatory beta subunit 4	-2.22023	0.228285	6.23 x 10-4
MSH2	mutS homolog 2	-2.22228	0.218246	2.29 x 10-4
RIMS4	regulating synaptic membrane exocytosis 4	-2.22708	0.562172	0.0187032
LMNB2	lamin B2	-2.22816	0.551355	0.0112987
MCM3	minichromosome maintenance complex component 3	-2.22967	0.218052	5.08 x 10-5
KIF20B	kinesin family member 20B	-2.23474	0.446218	0.00232325
GPM6B	glycoprotein M6B	-2.23523	0.496473	0.0140495
ANK3	ankyrin 3	-2.23552	0.744245	0.0392982
VWA2	von Willebrand factor A domain containing 2	-2.2408	0.320981	0.00128702
PCP2	Purkinje cell protein 2	-2.24202	0.871206	0.0458476
PYCR1	pyrroline-5-carboxylate reductase 1	-2.24481	0.759515	0.0364891
HIST1H4B	histone cluster 1 H4 family member b	-2.25165	0.379586	8.41 x 10-4
ZBTB8B	zinc finger and BTB domain containing 8B	-2.25337	0.368796	0.00551666
HEYL	hes related family bHLH transcription factor with YRPW motif-like	-2.25515	0.57367	0.0142738
TCF19	transcription factor 19	-2.25578	0.458002	0.00626479
TCEAL7	transcription elongation factor A like 7	-2.25969	0.718201	0.017062
MYH10	myosin heavy chain 10	-2.26007	0.487523	0.00603112
CACNA1G	calcium voltage-gated channel subunit alpha1 G	-2.26661	0.64626	0.0128738
EDIL3	EGF like repeats and discoidin domains 3	-2.28053	0.857166	0.0330279
TMPO	thymopoietin	-2.28403	0.163856	2.24 x 10-5
CYGB	cytoglobin	-2.28425	0.40655	0.00466874
CLIC5	chloride intracellular channel 5	-2.291	0.303466	3.08 x 10-4
TICRR	TOPBP1 interacting checkpoint and replication regulator	-2.29376	0.498764	0.0044947
DENND2A	DENN domain containing 2A	-2.29433	0.543496	0.0119363
RFC3	replication factor C subunit 3	-2.29575	0.415324	0.00204399
TMEM98	transmembrane protein 98	-2.30236	0.655182	0.0115924
FANCB	Fanconi anemia complementation group B	-2.30456	0.342811	7.32 x 10-4
CLDN22	claudin 22	-2.30497	0.756569	0.0440334
SGO2	shugoshin 2	-2.30948	0.56791	0.00705718
PARPBP	PARP1 binding protein	-2.30956	0.562458	0.00519823
SMC4	structural maintenance of chromosomes 4	-2.30969	0.433295	0.00374715
BRCA1	BRCA1, DNA repair associated	-2.31199	0.350639	9.82 x 10-4
GAS2L3	growth arrest specific 2 like 3	-2.31715	0.560536	0.00581508
CYP4X1	cytochrome P450 family 4 subfamily X member 1	-2.32179	0.755486	0.041608
REPS2	RALBP1 associated Eps domain containing 2	-2.32498	0.503318	0.0056641
TENM4	teneurin transmembrane protein 4	-2.32541	0.281548	1.87 x 10-4
ASF1B	anti-silencing function 1B histone chaperone	-2.33105	0.326904	8.98 x 10-4
CKAP2L	cytoskeleton associated protein 2 like	-2.33252	0.6847	0.012097
HIST1H3I	histone cluster 1 H3 family member i	-2.33894	0.713902	0.0211016
FOXL2NB	FOXL2 neighbor	-2.33899	0.739919	0.0285115
GTSE1	G2 and S-phase expressed 1	-2.34752	0.531861	0.00520488
EPHX2	epoxide hydrolase 2	-2.36605	0.366811	0.00232148
DNA2	DNA replication helicase/nuclease 2	-2.36669	0.320842	0.00223186
GGCT	gamma-glutamylcyclotransferase	-2.36671	0.492064	0.00619871
HMGB2	high mobility group box 2	-2.38176	0.735556	0.0211126
NEIL3	nei like DNA glycosylase 3	-2.39237	0.554518	0.0100106
KLHL31	kelch like family member 31	-2.39256	0.331949	9.19 x 10-4
APOBEC3B	apolipoprotein B mRNA editing enzyme catalytic subunit 3B	-2.39471	0.527462	0.00557398
ORC1	origin recognition complex subunit 1	-2.39885	0.461232	0.00294865
UBE2S	ubiquitin conjugating enzyme E2 S	-2.4029	0.425726	0.00207877
NEDD9	neural precursor cell expressed, developmentally down-regulated 9	-2.40579	0.491678	0.00225843
C21orf58	chromosome 21 open reading frame 58	-2.40839	0.453121	0.00279721
WBSCR17	Williams-Beuren syndrome chromosome region 17	-2.41364	0.326972	2.38 x 10-4
AURKA	aurora kinase A	-2.41375	0.727221	0.0278041
RNASEH2A	ribonuclease H2 subunit A	-2.41438	0.372349	0.00222146
VWA8	von Willebrand factor A domain containing 8	-2.41677	0.517837	0.00300437
KIAA1524	KIAA1524	-2.42009	0.53336	0.00547119
WDR76	WD repeat domain 76	-2.42229	0.496611	0.0065605
PDE5A	phosphodiesterase 5A	-2.42471	0.599737	0.00588459
VTCN1	V-set domain containing T-cell activation inhibitor 1	-2.42616	0.404001	0.00114748
WDR77	WD repeat domain 77	-2.42986	0.585567	0.0172337
NRG2	neuregulin 2	-2.43602	0.264485	8.18 x 10-5
OPN3	opsin 3	-2.43614	0.501633	0.0117362
SGO1	shugoshin 1	-2.44187	0.572691	0.00528788
WNT11	Wnt family member 11	-2.44215	0.818942	0.0360018
FANCD2	Fanconi anemia complementation group D2	-2.44451	0.432673	0.00390479
HIST2H4A	histone cluster 2 H4 family member a	-2.45141	0.505763	0.00413241
PLK2	polo like kinase 2	-2.45954	0.390262	0.00164646
NETO2	neuropilin and tolloid like 2	-2.46052	0.588283	0.00906775
IL33	interleukin 33	-2.46139	0.896187	0.027648
ATP6V0E2	ATPase H+ transporting V0 subunit e2	-2.46227	0.630601	0.019959
DYNC1I1	dynein cytoplasmic 1 intermediate chain 1	-2.46257	0.521397	0.0028685
ATAD2	ATPase family, AAA domain containing 2	-2.4668	0.50337	0.00499567
HIST1H4L	histone cluster 1 H4 family member l	-2.46804	0.747715	0.0140906
BMPR1B	bone morphogenetic protein receptor type 1B	-2.46807	0.79546	0.0170895
E2F1	E2F transcription factor 1	-2.47242	0.325564	4.99 x 10-4
STARD4	StAR related lipid transfer domain containing 4	-2.47458	0.734729	0.01306
GLYATL2	glycine-N-acyltransferase like 2	-2.48375	0.179503	1.32 x 10-4
TCEAL5	transcription elongation factor A like 5	-2.48579	0.422749	0.00777334
PCDH10	protocadherin 10	-2.48592	0.466452	0.00430623
RACGAP1	Rac GTPase activating protein 1	-2.48671	0.630949	0.00865
SH3BGR	SH3 domain binding glutamate rich protein	-2.4948	0.825733	0.0286763
LPAR3	lysophosphatidic acid receptor 3	-2.49593	0.64405	0.00837315
FRRS1L	ferric chelate reductase 1 like	-2.50285	0.595849	0.0113157
STX18	syntaxin 18	-2.50345	0.371883	0.00137392
POC1B-GALNT4	POC1B-GALNT4 readthrough	-2.50572	0.520498	0.00281592
FEN1	flap structure-specific endonuclease 1	-2.51074	0.484253	0.00820119
GINS4	GINS complex subunit 4	-2.51084	0.450635	0.00198876
PLOD1	procollagen-lysine,2-oxoglutarate 5-dioxygenase 1	-2.52147	0.332604	2.29 x 10-4
ZNF492	zinc finger protein 492	-2.52186	0.282304	4.69 x 10-4
ARHGEF26	Rho guanine nucleotide exchange factor 26	-2.52647	0.396422	0.0023182
NES	nestin	-2.52706	0.549585	0.00325734
DTL	denticleless E3 ubiquitin protein ligase homolog	-2.52712	0.477671	0.00216343
CCDC74B	coiled-coil domain containing 74B	-2.52861	0.579538	0.00430123
CADM1	cell adhesion molecule 1	-2.52909	0.986369	0.0464024
FAM159A	family with sequence similarity 159 member A	-2.53536	0.343626	3.16 x 10-4
PCNA	proliferating cell nuclear antigen	-2.53546	0.301031	8.32 x 10-4
CCNA1	cyclin A1	-2.53639	0.667509	0.0113452
DDIAS	DNA damage induced apoptosis suppressor	-2.53739	0.395466	5.43 x 10-4
GDF7	growth differentiation factor 7	-2.5423	0.885619	0.022963
ECI2	enoyl-CoA delta isomerase 2	-2.54491	0.548479	0.00693973
SHMT1	serine hydroxymethyltransferase 1	-2.5457	0.543846	0.00255961
ZNF589	zinc finger protein 589	-2.54893	0.642275	0.0172281
GRB14	growth factor receptor bound protein 14	-2.56022	0.576826	0.00992555
KLHL23	kelch like family member 23	-2.56223	0.705489	0.0129815
BLM	Bloom syndrome RecQ like helicase	-2.57202	0.559268	0.0120446
FBXO5	F-box protein 5	-2.57517	0.457398	0.00133573
CSRNP3	cysteine and serine rich nuclear protein 3	-2.57702	0.510011	0.00190666
UCN2	urocortin 2	-2.57967	0.692676	0.0230572
PTHLH	parathyroid hormone like hormone	-2.57984	0.755327	0.0183158
CDC25A	cell division cycle 25A	-2.58441	0.445892	0.00605698
HIST1H3D	histone cluster 1 H3 family member d	-2.59559	0.650378	0.00879937
HMGB3	high mobility group box 3	-2.59756	0.26432	4.27 x 10-4
E2F7	E2F transcription factor 7	-2.59942	0.428932	7.92 x 10-4
MSX1	msh homeobox 1	-2.60466	0.516661	0.00246082
LAMP5	lysosomal associated membrane protein family member 5	-2.60564	0.402354	0.00111995
ZNF730	zinc finger protein 730	-2.61948	0.368812	9.67 x 10-4
LFNG	LFNG O-fucosylpeptide 3-beta-N-acetylglucosaminyltransferase	-2.62707	0.787942	0.0320253
MXD3	MAX dimerization protein 3	-2.6295	0.580139	0.00304627
VEPH1	ventricular zone expressed PH domain containing 1	-2.63177	0.61283	0.00404922
SORBS2	sorbin and SH3 domain containing 2	-2.63406	0.538391	0.00488603
HIST1H2BD	histone cluster 1 H2B family member d	-2.63608	0.391919	4.10 x 10-4
COL27A1	collagen type XXVII alpha 1 chain	-2.63724	0.92704	0.0411351
MCM10	minichromosome maintenance 10 replication initiation factor	-2.64518	0.539121	0.0103175
PRKCQ	protein kinase C theta	-2.64556	0.702599	0.0116795
MCM7	minichromosome maintenance complex component 7	-2.64917	0.213754	1.29 x 10-5
MRC2	mannose receptor C type 2	-2.6563	0.482975	0.00626953
FOXL2	forkhead box L2	-2.65656	0.79885	0.024664
PLK4	polo like kinase 4	-2.65701	0.549097	0.00910369
MXRA5	matrix remodeling associated 5	-2.66011	0.792935	0.0203535
TROAP	trophinin associated protein	-2.66259	0.907671	0.0257551
TK1	thymidine kinase 1	-2.66407	0.584025	0.0049477
PSRC1	proline and serine rich coiled-coil 1	-2.67685	0.623305	0.00390907
MCM4	minichromosome maintenance complex component 4	-2.67691	0.412076	0.00283279
AEN	apoptosis enhancing nuclease	-2.67848	0.399985	6.50 x 10-4
WNT7A	Wnt family member 7A	-2.68119	0.628686	0.0103845
C16orf59	chromosome 16 open reading frame 59	-2.68486	0.4264	7.65 x 10-4
RCOR2	REST corepressor 2	-2.68677	0.603049	0.0117249
KIF4A	kinesin family member 4A	-2.6973	0.647992	0.00450914
TMEM178A	transmembrane protein 178A	-2.6992	0.601297	0.00825577
HHIP	hedgehog interacting protein	-2.70084	0.45273	0.00128478
PCDH7	protocadherin 7	-2.70202	0.503444	0.00862068
MAP2K6	mitogen-activated protein kinase kinase 6	-2.70544	0.629717	0.0088157
TMEM26	transmembrane protein 26	-2.71813	0.92633	0.0449819
CENPH	centromere protein H	-2.72195	0.332997	1.76 x 10-4
CLSPN	claspin	-2.73679	0.531903	0.00179755
MFSD2A	major facilitator superfamily domain containing 2A	-2.73793	1.13993	0.0457805
HIST1H1D	histone cluster 1 H1 family member d	-2.74241	0.526965	0.00228692
POLQ	DNA polymerase theta	-2.74284	0.578301	0.00833567
PABPC4L	poly(A) binding protein cytoplasmic 4 like	-2.74312	0.510972	0.00277951
LRRN1	leucine rich repeat neuronal 1	-2.74453	0.439497	0.0019051
CLEC11A	C-type lectin domain containing 11A	-2.7447	0.571832	0.00225251
MDK	midkine (neurite growth-promoting factor 2)	-2.77002	0.937017	0.0202897
EPB41L2	erythrocyte membrane protein band 4.1 like 2	-2.77965	0.521115	0.00228013
SPC25	SPC25, NDC80 kinetochore complex component	-2.78092	0.521679	0.00729445
FNDC5	fibronectin type III domain containing 5	-2.7813	0.284457	7.82 x 10-4
ARHGAP11A	Rho GTPase activating protein 11A	-2.78337	0.642315	0.00464194
GJB6	gap junction protein beta 6	-2.78554	0.675852	0.0117455
CENPN	centromere protein N	-2.78741	0.552436	0.00470907
PAG1	phosphoprotein membrane anchor with glycosphingolipid microdomains 1	-2.78928	0.747807	0.0178573
SULT1A1	sulfotransferase family 1A member 1	-2.79207	0.590453	0.00273232
MCOLN2	mucolipin 2	-2.79525	0.89951	0.0218737
NDRG2	NDRG family member 2	-2.79667	0.672798	0.00896095
TRIP13	thyroid hormone receptor interactor 13	-2.79778	0.467128	0.00248009
TMEFF1	transmembrane protein with EGF like and two follistatin like domains 1	-2.8009	0.731737	0.0129564
HIST1H2AD	histone cluster 1 H2A family member d	-2.80643	0.65853	0.0149557
SCD5	stearoyl-CoA desaturase 5	-2.81589	0.241866	9.69 x 10-5
IQGAP3	IQ motif containing GTPase activating protein 3	-2.81675	0.707985	0.00587486
PNMA8A	paraneoplastic Ma antigen family member 8A	-2.82349	0.865197	0.0266104
BUB1	BUB1 mitotic checkpoint serine/threonine kinase	-2.82772	0.738288	0.0128691
PLCH1	phospholipase C eta 1	-2.83448	0.489707	0.00639133
BMP7	bone morphogenetic protein 7	-2.83614	0.542154	0.00969015
PLCB1	phospholipase C beta 1	-2.84029	0.360044	2.45 x 10-4
OIP5	Opa interacting protein 5	-2.8415	0.504919	0.00274576
UCHL1	ubiquitin C-terminal hydrolase L1	-2.84559	1.21515	0.0489773
HIST1H2BI	histone cluster 1 H2B family member i	-2.84615	0.702683	0.0100107
KIF2C	kinesin family member 2C	-2.84635	0.726847	0.00734736
SH3RF2	SH3 domain containing ring finger 2	-2.84934	0.541694	0.00206626
KIAA1210	KIAA1210	-2.85147	0.876258	0.0157085
CGNL1	cingulin like 1	-2.8597	0.826273	0.0104793
WFDC2	WAP four-disulfide core domain 2	-2.86245	0.885592	0.0173415
MFAP2	microfibrillar associated protein 2	-2.88342	0.561114	0.00368289
MPPED2	metallophosphoesterase domain containing 2	-2.88487	0.954281	0.0187097
SKA1	spindle and kinetochore associated complex subunit 1	-2.88768	0.627876	0.00671253
ANXA9	annexin A9	-2.89285	0.466101	0.00344548
ERCC6L	ERCC excision repair 6 like, spindle assembly checkpoint helicase	-2.89347	0.433081	0.00349745
ATP1A2	ATPase Na+/K+ transporting subunit alpha 2	-2.89831	0.796443	0.0307112
BEX1	brain expressed X-linked 1	-2.90987	0.706184	0.0186038
CENPI	centromere protein I	-2.91047	0.524336	0.00223349
SKA3	spindle and kinetochore associated complex subunit 3	-2.91423	0.52509	0.00210561
HIST1H3H	histone cluster 1 H3 family member h	-2.92125	0.778051	0.0169663
H2AFX	H2A histone family member X	-2.92129	0.582986	0.00471475
ATP8B3	ATPase phospholipid transporting 8B3	-2.92813	0.530797	0.00627868
KIFC1	kinesin family member C1	-2.93275	0.631783	0.0035903
FANCI	Fanconi anemia complementation group I	-2.93334	0.494365	0.00142531
HIST2H2BF	histone cluster 2 H2B family member f	-2.9456	0.349254	1.12 x 10-4
DIAPH3	diaphanous related formin 3	-2.94726	0.705383	0.00586088
ITGA6	integrin subunit alpha 6	-2.96188	0.509306	0.00175477
CDC45	cell division cycle 45	-2.96501	0.628325	0.0131863
BEX2	brain expressed X-linked 2	-2.96664	0.740897	0.00575779
CKS2	CDC28 protein kinase regulatory subunit 2	-2.97235	0.516881	0.00888374
SLC2A11	solute carrier family 2 member 11	-2.98177	0.780966	0.0167299
ECT2	epithelial cell transforming 2	-2.98315	0.466225	6.82 x 10-4
HIST1H2BJ	histone cluster 1 H2B family member j	-2.98857	0.67054	0.00602669
ZNF695	zinc finger protein 695	-2.99022	0.216877	6.54 x 10-5
MCM2	minichromosome maintenance complex component 2	-2.99343	0.383262	2.31 x 10-4
BTBD11	BTB domain containing 11	-3.00021	0.584774	0.00612408
GATA2	GATA binding protein 2	-3.00324	0.520781	0.00118778
HIST1H2AK	histone cluster 1 H2A family member k	-3.02094	0.63641	0.00693272
CDCA3	cell division cycle associated 3	-3.02224	0.433368	5.25 x 10-4
TMEM120B	transmembrane protein 120B	-3.03012	0.989781	0.0181518
MYBL2	MYB proto-oncogene like 2	-3.03153	0.574664	0.00199248
DHFR	dihydrofolate reductase	-3.03552	0.51868	0.00771788
SPC24	SPC24, NDC80 kinetochore complex component	-3.04158	0.723019	0.0121308
GGH	gamma-glutamyl hydrolase	-3.04245	0.554883	0.00227458
GALNT4	polypeptide N-acetylgalactosaminyltransferase 4	-3.04336	0.502952	0.00184595
LRRC17	leucine rich repeat containing 17	-3.04643	0.988182	0.0181923
CREB3L4	cAMP responsive element binding protein 3 like 4	-3.05886	0.766007	0.0060169
HIST1H2BM	histone cluster 1 H2B family member m	-3.06956	0.730252	0.0133424
KIF18A	kinesin family member 18A	-3.07098	0.779295	0.0078916
KIF14	kinesin family member 14	-3.07249	0.67067	0.00533604
HIST1H4H	histone cluster 1 H4 family member h	-3.08187	0.304754	4.22 x 10-5
FRAS1	Fraser extracellular matrix complex subunit 1	-3.08387	0.9437	0.0163957
GJA4	gap junction protein alpha 4	-3.08783	0.813294	0.0204828
HIST1H3F	histone cluster 1 H3 family member f	-3.08839	0.749127	0.0156395
CDC25C	cell division cycle 25C	-3.08904	0.79059	0.00661122
LEF1	lymphoid enhancer binding factor 1	-3.08959	0.533065	0.00545252
TMEM106C	transmembrane protein 106C	-3.09079	0.564034	0.00282126
SGCD	sarcoglycan delta	-3.0915	0.354395	1.11 x 10-4
HIST2H2AB	histone cluster 2 H2A family member b	-3.09701	0.360647	1.75x 10-4
DPYSL4	dihydropyrimidinase like 4	-3.09743	0.676013	0.00592728
HIST1H2AE	histone cluster 1 H2A family member e	-3.11493	0.549164	0.00318158
HIST1H2AM	histone cluster 1 H2A family member m	-3.12007	0.595341	0.00384337
CKAP2	cytoskeleton associated protein 2	-3.13119	0.419635	2.82 x 10-4
CDC6	cell division cycle 6	-3.1353	0.680192	0.0128352
HIST1H2AJ	histone cluster 1 H2A family member j	-3.13891	0.710942	0.00725208
CENPA	centromere protein A	-3.14712	0.749188	0.00693921
DACT2	dishevelled binding antagonist of beta catenin 2	-3.15024	0.773708	0.00596617
PLEKHG4B	pleckstrin homology and RhoGEF domain containing G4B	-3.15376	0.354316	7.88 x 10-4
TRIB2	tribbles pseudokinase 2	-3.16163	1.02236	0.0448412
MKI67	marker of proliferation Ki-67	-3.16646	1.01145	0.0187284
EGFL6	EGF like domain multiple 6	-3.17694	0.916394	0.0117855
CDCA7	cell division cycle associated 7	-3.2031	0.558819	0.00181313
CENPE	centromere protein E	-3.20703	0.833875	0.00774447
TNFRSF19	TNF receptor superfamily member 19	-3.21627	0.675682	0.00371267
CENPK	centromere protein K	-3.21707	0.637303	0.00648361
PTCH1	patched 1	-3.21902	0.812705	0.00657684
PIK3R3	phosphoinositide-3-kinase regulatory subunit 3	-3.22296	0.507846	0.00198172
CRMP1	collapsin response mediator protein 1	-3.23045	0.771738	0.00586741
RAD51AP1	RAD51 associated protein 1	-3.23474	0.617659	0.00215995
HIST1H4D	histone cluster 1 H4 family member d	-3.23886	0.433854	5.92 x 10-4
EPHA7	EPH receptor A7	-3.24501	0.742059	0.00380783
HIST1H2AL	histone cluster 1 H2A family member l	-3.24703	0.715552	0.00459669
GLT8D2	glycosyltransferase 8 domain containing 2	-3.24863	0.590269	0.00273802
TYMS	thymidylate synthetase	-3.25165	0.706291	0.00397392
HIST1H2BN	histone cluster 1 H2B family member n	-3.25538	0.580263	0.00230503
ESR1	estrogen receptor 1	-3.25831	0.579659	0.00473772
LYPD6	LY6/PLAUR domain containing 6	-3.26001	0.172713	5.86 x 10-5
HIST1H2BH	histone cluster 1 H2B family member h	-3.27028	0.662508	0.0112109
EPHA5	EPH receptor A5	-3.27503	0.961322	0.0279886
HJURP	Holliday junction recognition protein	-3.27628	0.820388	0.0081056
BRIP1	BRCA1 interacting protein C-terminal helicase 1	-3.28277	0.613628	0.00201199
MND1	meiotic nuclear divisions 1	-3.28565	0.647852	0.00254732
SPAG5	sperm associated antigen 5	-3.29002	0.613673	0.00154432
SHCBP1	SHC binding and spindle associated 1	-3.29454	0.917559	0.0130413
SCG5	secretogranin V	-3.29598	0.731767	0.00381602
FAM169A	family with sequence similarity 169 member A	-3.29915	0.636459	0.00485602
GCLC	glutamate-cysteine ligase catalytic subunit	-3.29934	0.903526	0.0312479
HIST1H3J	histone cluster 1 H3 family member j	-3.30759	0.792219	0.00643152
CKB	creatine kinase B	-3.3444	1.12502	0.0322277
EMID1	EMI domain containing 1	-3.34581	0.88789	0.0121682
HIST1H2BG	histone cluster 1 H2B family member g	-3.35886	0.505822	0.00127432
COL23A1	collagen type XXIII alpha 1 chain	-3.35965	0.870502	0.0148298
PRSS12	protease, serine 12	-3.38777	0.829553	0.0185092
ASPM	abnormal spindle microtubule assembly	-3.40074	0.899479	0.00850802
SLC27A6	solute carrier family 27 member 6	-3.40799	0.941659	0.0205446
XRCC2	X-ray repair cross complementing 2	-3.42023	0.255858	2.44 x 10-4
PDGFC	platelet derived growth factor C	-3.45595	0.927326	0.0159006
HMGA2	high mobility group AT-hook 2	-3.4663	0.428135	0.00176009
IGF1	insulin like growth factor 1	-3.47191	0.820087	0.0159777
ORC6	origin recognition complex subunit 6	-3.4789	0.631527	0.00398309
GLA	galactosidase alpha	-3.51044	0.518214	5.40 x 10-4
TMEM132A	transmembrane protein 132A	-3.51662	0.840998	0.0206071
HIST1H2AB	histone cluster 1 H2A family member b	-3.521	0.868447	0.0127411
VSTM4	V-set and transmembrane domain containing 4	-3.52813	0.618773	0.00137008
CNTN1	contactin 1	-3.53709	0.883074	0.00883299
MMP16	matrix metallopeptidase 16	-3.53966	0.562969	0.00101931
MRAP2	melanocortin 2 receptor accessory protein 2	-3.54193	1.29554	0.0418745
[truncated: 159 more rows]
